# Supplementary material for: New insights into the Weddell Sea ecosystem applying a quantitative network approach
Source: Copernicus journal article supplement (doi:10.5194/egusphere-2022-1518), 2023-01-20
Supplement: Supplementary file 1 [file egusphere-2022-1518-supplement.pdf]

# Supplementary Material for ‘New insights into the Weddell Sea ecosystem applying a quantitative network approach’

Tomás I. Marina, Leonardo A. Saravia and Susanne Kortsch

## Equations for calculating species properties

We used the estimation of the interaction strength as the weighted property for the species of the Weddell Sea food web. The main equation to estimate the interaction strength  $IS$  was:

$$IS = \alpha X_R \frac{m_R}{m_C}$$

where  $\alpha$  is the search rate,  $X_R$  is the resource density, and  $m_R$  and  $m_C$  are the body mass for the resource and the consumer, respectively (Pawar, Dell, and Van M. Savage 2012).

As unweighted properties we calculated degree, trophic level and trophic similarity. The degree  $k$  is simply the total number of feeding links in which the species participates. It was calculated as:

$$L = \sum_{i=1}^S k_i$$

where  $L$  is the total number of feeding links for the  $i^{th}$  species in the food web; here denoted as  $k_i$ . The trophic level refers to a species’ vertical position in the food web, relative to the primary producers that support the community. Species that do not consume any other species in the web are primary producers or other basal resources; species with no predators are top predators; those with both predators and prey are intermediate consumers. Trophic levels  $TP$  were calculated for every species based on its position in the food web using the “prey-averaged technique”:

$$TP_i = \frac{\sum_j TP_j}{n_i} + 1$$

where  $n_i$  is the total number of prey taxa consumed by taxon  $i$ , and  $TP_j$  represents the trophic position of all prey items  $j$  of taxon  $i$  (Thompson et al. 2007). The trophic similarity  $TS$  between every pair of species in the food web was calculated using the following algorithm:

$$TS = \frac{c}{a + b + c}$$

where  $c$  is the number of predators and prey common to the two species,  $a$  is the number of predators and prey unique to one species, and  $b$  is the number of predators and prey unique to the other species. When the two species have the same set of predators and prey,  $TS = 1$ ; when the two species have no common predators or common prey,  $TS = 0$  (Martinez 1991).

Table 1 shows the mentioned properties for every species of the Weddell Sea food web.

Table 1: Weighted (interaction strength) and unweighted properties of the species of Weddell Sea food web. Ordered by decreasing mean interaction strength. IS\_mean = mean interaction strength, TL = trophic level, TS = trophic similarity.

| Species                    | IS_mean   | Degree | TL   | TS    |
|----------------------------|-----------|--------|------|-------|
| Orcinus orca               | 0.0001825 | 26     | 5.03 | 0.037 |
| Mesonychoteuthis hamiltoni | 0.0001802 | 29     | 4.41 | 0.028 |
| Mirounga leonina           | 0.0001203 | 56     | 4.87 | 0.080 |
| Physeter macrocephalus     | 0.0001139 | 20     | 4.47 | 0.048 |
| Leptonychotes weddelli     | 0.0001060 | 59     | 4.86 | 0.084 |
| Galiteuthis glacialis      | 0.0001050 | 30     | 3.26 | 0.039 |
| Ommatophoca rossii         | 0.0001042 | 56     | 4.87 | 0.080 |
| Hydrurga leptonyx          | 0.0001031 | 67     | 4.72 | 0.094 |
| Tursiops truncatus         | 0.0001011 | 20     | 4.47 | 0.048 |
| Arctocephalus gazella      | 0.0000928 | 61     | 4.67 | 0.093 |
| Lagenorhynchus cruciger    | 0.0000903 | 20     | 4.47 | 0.048 |
| Gonatus antarcticus        | 0.0000895 | 36     | 4.31 | 0.046 |
| Kondakovia longimana       | 0.0000846 | 25     | 3.26 | 0.039 |
| Macrourus holotrachys      | 0.0000830 | 85     | 4.70 | 0.112 |
| Notothenia marmorata       | 0.0000827 | 44     | 4.09 | 0.091 |
| Parvicorbucula socialis    | 0.0000817 | 91     | 2.00 | 0.136 |
| Martialia hyadesi          | 0.0000816 | 33     | 4.52 | 0.043 |
| Aptenodytes forsteri       | 0.0000809 | 53     | 4.78 | 0.084 |
| Lobodon carcinophaga       | 0.0000799 | 28     | 4.24 | 0.061 |
| Macronectes halli          | 0.0000792 | 11     | 4.94 | 0.026 |
| Cryodraco antarcticus      | 0.0000791 | 30     | 3.52 | 0.089 |
| Dissostichus mawsoni       | 0.0000782 | 87     | 4.12 | 0.126 |
| Champscephalus gunnari     | 0.0000762 | 46     | 3.72 | 0.086 |
| Balaenoptera physalus      | 0.0000740 | 37     | 4.04 | 0.081 |
| Moroteuthis ingens         | 0.0000724 | 46     | 4.04 | 0.074 |
| Dacodraco hunteri          | 0.0000719 | 65     | 4.80 | 0.101 |
| Macrourus whitsoni         | 0.0000714 | 92     | 4.55 | 0.124 |
| Pagetopsis macropterus     | 0.0000708 | 76     | 4.64 | 0.113 |
| Pygoscelis adeliae         | 0.0000694 | 7      | 3.78 | 0.026 |
| Balaenoptera musculus      | 0.0000686 | 37     | 4.04 | 0.081 |
| Alluroteuthis antarcticus  | 0.0000686 | 19     | 4.25 | 0.029 |
| Pleuragramma antarcticum   | 0.0000681 | 69     | 3.58 | 0.076 |
| Chionodraco hamatus        | 0.0000658 | 42     | 3.82 | 0.107 |
| Muraenolepis marmoratus    | 0.0000639 | 36     | 3.19 | 0.104 |
| Chionodraco myersi         | 0.0000636 | 37     | 4.09 | 0.094 |
| Balaenoptera acutorostrata | 0.0000612 | 29     | 3.74 | 0.078 |
| Daption capense            | 0.0000602 | 15     | 4.39 | 0.051 |
| Chaenodraco wilsoni        | 0.0000594 | 32     | 3.30 | 0.091 |
| Fulmarus glacialis         | 0.0000585 | 17     | 4.33 | 0.052 |
| Macronectes giganteus      | 0.0000541 | 16     | 4.30 | 0.044 |
| Pagetopsis maculatus       | 0.0000531 | 37     | 4.09 | 0.094 |
| Megaptera novaeangliae     | 0.0000531 | 4      | 3.26 | 0.024 |
| Psychroteuthis glacialis   | 0.0000529 | 23     | 3.91 | 0.054 |
| Thalassoica antarctica     | 0.0000517 | 19     | 4.32 | 0.053 |
| Gymnoscopelus nicholsi     | 0.0000499 | 59     | 3.71 | 0.087 |
| Notothenia coriiceps       | 0.0000494 | 130    | 4.27 | 0.126 |
| Gymnodraco acuticeps       | 0.0000490 | 61     | 3.70 | 0.118 |

| Species                            | IS_mean   | Degree | TL   | TS    |
|------------------------------------|-----------|--------|------|-------|
| <i>Procellaria aequinoctialis</i>  | 0.0000482 | 8      | 4.25 | 0.026 |
| <i>Sterna vittata</i>              | 0.0000466 | 2      | 3.88 | 0.012 |
| <i>Pagodroma nivea</i>             | 0.0000464 | 11     | 4.21 | 0.045 |
| <i>Trematomus hansonii</i>         | 0.0000461 | 109    | 4.36 | 0.134 |
| <i>Halobaena caerulea</i>          | 0.0000450 | 22     | 4.25 | 0.060 |
| <i>Aphrodroma brevirostris</i>     | 0.0000449 | 11     | 4.20 | 0.045 |
| <i>Racovitzia glacialis</i>        | 0.0000441 | 53     | 3.54 | 0.114 |
| <i>Gymnoscopelus opisthopterus</i> | 0.0000436 | 54     | 3.40 | 0.082 |
| <i>Bathylagus antarcticus</i>      | 0.0000432 | 61     | 3.36 | 0.073 |
| <i>Pachyptila desolata</i>         | 0.0000420 | 33     | 4.23 | 0.079 |
| <i>Cygnodraco mawsoni</i>          | 0.0000419 | 84     | 3.98 | 0.139 |
| <i>Psilaster charcoti</i>          | 0.0000417 | 59     | 4.40 | 0.082 |
| <i>Electrona antarctica</i>        | 0.0000410 | 65     | 3.48 | 0.105 |
| <i>Pentanympyon antarcticum</i>    | 0.0000385 | 140    | 3.93 | 0.099 |
| <i>Gerlachea australis</i>         | 0.0000385 | 72     | 3.93 | 0.134 |
| <i>Pareledone charcoti</i>         | 0.0000381 | 83     | 4.57 | 0.108 |
| <i>Trematomus loennbergii</i>      | 0.0000374 | 133    | 4.11 | 0.115 |
| <i>Gymnoscopelus braueri</i>       | 0.0000373 | 62     | 3.52 | 0.087 |
| <i>Protomyctophum bolini</i>       | 0.0000367 | 61     | 3.44 | 0.077 |
| <i>Muraenolepis microps</i>        | 0.0000360 | 88     | 3.69 | 0.133 |
| <i>Trematomus eulepidotus</i>      | 0.0000358 | 71     | 3.64 | 0.117 |
| <i>Pareledone antarctica</i>       | 0.0000354 | 107    | 4.41 | 0.120 |
| <i>Artedidraco orianae</i>         | 0.0000352 | 52     | 3.76 | 0.117 |
| <i>Oceanites oceanicus</i>         | 0.0000347 | 8      | 4.07 | 0.033 |
| <i>Notolepis coatsi</i>            | 0.0000347 | 58     | 3.50 | 0.073 |
| <i>Sterna paradisaea</i>           | 0.0000331 | 7      | 4.04 | 0.031 |
| <i>Prionodraco evansii</i>         | 0.0000321 | 61     | 3.45 | 0.115 |
| <i>Pogonophryne marmorata</i>      | 0.0000313 | 70     | 3.68 | 0.119 |
| <i>Trematomus pennellii</i>        | 0.0000304 | 192    | 4.04 | 0.158 |
| <i>Callochiton gaussi</i>          | 0.0000299 | 15     | 3.00 | 0.012 |
| <i>Trematomus nicolai</i>          | 0.0000282 | 113    | 3.85 | 0.140 |
| <i>Pogonophryne scotti</i>         | 0.0000280 | 104    | 3.93 | 0.142 |
| <i>Pogonophryne phyllopogon</i>    | 0.0000268 | 103    | 3.92 | 0.145 |
| <i>Pogonophryne barsukovi</i>      | 0.0000257 | 104    | 3.93 | 0.142 |
| <i>Abyssorhynchus nodimanus</i>    | 0.0000256 | 137    | 4.21 | 0.130 |
| <i>Pachycara brachycephalum</i>    | 0.0000252 | 67     | 3.97 | 0.132 |
| <i>Eusirus perdentatus</i>         | 0.0000249 | 114    | 3.87 | 0.171 |
| <i>Epimeria rubrieques</i>         | 0.0000245 | 85     | 3.47 | 0.157 |
| <i>Desmonema glaciale</i>          | 0.0000240 | 19     | 3.72 | 0.058 |
| <i>Pogonophryne permitini</i>      | 0.0000235 | 104    | 3.93 | 0.142 |
| <i>Hyperia macrocephala</i>        | 0.0000233 | 58     | 4.36 | 0.135 |
| <i>Tryphosella murrayi</i>         | 0.0000229 | 96     | 3.88 | 0.160 |
| <i>Puncturella conica</i>          | 0.0000227 | 80     | 2.98 | 0.093 |
| <i>Euphausia superba</i>           | 0.0000224 | 163    | 2.27 | 0.120 |
| <i>Epimeria robusta</i>            | 0.0000222 | 90     | 3.46 | 0.159 |
| <i>Aethotaxis mitopteryx</i>       | 0.0000221 | 109    | 3.88 | 0.149 |
| <i>Trematomus lepidorhinus</i>     | 0.0000214 | 95     | 3.81 | 0.123 |
| <i>Callianira antarctica</i>       | 0.0000210 | 28     | 3.60 | 0.064 |
| <i>Pseudosagitta gazellae</i>      | 0.0000205 | 11     | 3.18 | 0.029 |
| <i>Primno macropa</i>              | 0.0000201 | 74     | 3.56 | 0.150 |
| <i>Periphylla periphylla</i>       | 0.0000198 | 19     | 3.72 | 0.058 |
| <i>Eusirus antarcticus</i>         | 0.0000194 | 53     | 3.17 | 0.148 |

| Species                      | IS_mean   | Degree | TL   | TS    |
|------------------------------|-----------|--------|------|-------|
| Harpagifer antarcticus       | 0.0000193 | 78     | 3.80 | 0.102 |
| Pseudosagitta maxima         | 0.0000191 | 15     | 3.16 | 0.044 |
| Probuccinum tenuistriatum    | 0.0000190 | 41     | 4.24 | 0.117 |
| Colossendeis scotti          | 0.0000189 | 135    | 3.93 | 0.099 |
| Ammothea carolinensis        | 0.0000189 | 135    | 3.93 | 0.099 |
| Nymphon gracillimum          | 0.0000188 | 135    | 3.93 | 0.099 |
| Themisto gaudichaudii        | 0.0000183 | 74     | 3.56 | 0.150 |
| Trematomus scotti            | 0.0000183 | 146    | 3.82 | 0.153 |
| Beroe cucumis                | 0.0000179 | 18     | 3.33 | 0.040 |
| Scolymastra joubini          | 0.0000177 | 44     | 2.00 | 0.156 |
| Eurythenes gryllus           | 0.0000173 | 210    | 3.53 | 0.136 |
| Clione antarctica            | 0.0000171 | 56     | 2.58 | 0.075 |
| Anoxycalyx joubini           | 0.0000170 | 48     | 2.00 | 0.153 |
| Euphausia crystallorophias   | 0.0000166 | 132    | 2.08 | 0.119 |
| Artedidraco skottsbergi      | 0.0000163 | 135    | 3.86 | 0.138 |
| Trematomus bernacchii        | 0.0000162 | 118    | 3.62 | 0.104 |
| Paraceradocus gibber         | 0.0000161 | 151    | 2.80 | 0.171 |
| Eunoe spica                  | 0.0000161 | 214    | 4.04 | 0.151 |
| Liljeborgia georgiana        | 0.0000160 | 146    | 3.46 | 0.153 |
| Dipulmaris antarctica        | 0.0000159 | 14     | 3.80 | 0.040 |
| Artedidraco loennbergi       | 0.0000159 | 133    | 3.88 | 0.143 |
| Oediceroides emarginatus     | 0.0000156 | 153    | 2.77 | 0.166 |
| Rossella nuda                | 0.0000147 | 45     | 2.00 | 0.159 |
| Eunoe spica spicoides        | 0.0000143 | 249    | 3.94 | 0.142 |
| Lyrocteis flavopallidus      | 0.0000141 | 28     | 3.60 | 0.064 |
| Dolloidraco longedorsalis    | 0.0000139 | 168    | 3.72 | 0.150 |
| Solmundella bitentaculata    | 0.0000138 | 8      | 3.90 | 0.020 |
| Melphidippa antarctica       | 0.0000136 | 121    | 3.04 | 0.119 |
| Cyllopus lucasii             | 0.0000135 | 165    | 2.39 | 0.156 |
| Antarctomysis maxima         | 0.0000133 | 105    | 2.36 | 0.133 |
| Clio pyramidata              | 0.0000131 | 58     | 3.16 | 0.088 |
| Clione limacina              | 0.0000129 | 51     | 3.87 | 0.073 |
| Oediceroides calmani         | 0.0000125 | 153    | 2.77 | 0.166 |
| Bathypanoploea schellenbergi | 0.0000122 | 195    | 2.87 | 0.146 |
| Thysanoessa macrura          | 0.0000122 | 145    | 2.41 | 0.117 |
| Epimeria georgiana           | 0.0000120 | 139    | 2.53 | 0.169 |
| Euphausia frigida            | 0.0000119 | 137    | 2.27 | 0.119 |
| Ophiosparte gigas            | 0.0000118 | 301    | 3.43 | 0.155 |
| Eukrohnia hamata             | 0.0000117 | 38     | 3.16 | 0.075 |
| Waldeckia obesa              | 0.0000117 | 197    | 3.52 | 0.138 |
| Eucopia australis            | 0.0000117 | 105    | 2.36 | 0.133 |
| Uristes gigas                | 0.0000115 | 184    | 2.84 | 0.161 |
| Urticinopsis antarctica      | 0.0000114 | 27     | 3.76 | 0.078 |
| Atolla wyvillei              | 0.0000110 | 20     | 3.52 | 0.065 |
| Rhachotropis antarctica      | 0.0000110 | 185    | 3.02 | 0.176 |
| Epimeria similis             | 0.0000108 | 159    | 2.49 | 0.148 |
| Eulagisca gigantea           | 0.0000106 | 142    | 3.80 | 0.167 |
| Laetmonice producta          | 0.0000106 | 136    | 3.94 | 0.178 |
| Abyssorhomene plebs          | 0.0000106 | 107    | 2.08 | 0.159 |
| Systemopora contracta        | 0.0000104 | 31     | 2.00 | 0.125 |
| Epimeriella walkeri          | 0.0000103 | 217    | 2.88 | 0.148 |
| Sagitta marri                | 0.0000103 | 17     | 3.16 | 0.048 |

| Species                             | IS_mean   | Degree | TL   | TS    |
|-------------------------------------|-----------|--------|------|-------|
| <i>Polyeunoa laevis</i>             | 0.0000102 | 111    | 3.82 | 0.168 |
| <i>Aegires albus</i>                | 0.0000102 | 60     | 3.00 | 0.092 |
| <i>Bargmannia</i>                   | 0.0000102 | 56     | 3.33 | 0.091 |
| <i>Abyssorhomene rossi</i>          | 0.0000101 | 164    | 2.65 | 0.156 |
| <i>Stylocordyla borealis</i>        | 0.0000100 | 43     | 2.00 | 0.157 |
| <i>Ceratoserolis meridionalis</i>   | 0.0000098 | 90     | 3.99 | 0.157 |
| <i>Frontoserolis bouvieri</i>       | 0.0000098 | 90     | 3.99 | 0.157 |
| <i>Kirkpatrickia variolosa</i>      | 0.0000096 | 46     | 2.00 | 0.152 |
| <i>Rossella racovitzae</i>          | 0.0000095 | 48     | 2.00 | 0.154 |
| <i>Rhodalia miranda</i>             | 0.0000093 | 20     | 3.52 | 0.065 |
| <i>Dimophyes arctica</i>            | 0.0000093 | 20     | 3.52 | 0.065 |
| <i>Diphyes antarctica</i>           | 0.0000093 | 20     | 3.52 | 0.065 |
| <i>Serolella bouveri</i>            | 0.0000093 | 90     | 3.99 | 0.157 |
| <i>Serolis polita</i>               | 0.0000093 | 90     | 3.99 | 0.157 |
| <i>Cnemidocarpa verrucosa</i>       | 0.0000091 | 7      | 2.00 | 0.041 |
| <i>Epimeria macrodonta</i>          | 0.0000090 | 198    | 2.68 | 0.145 |
| <i>Heterophoxus videns</i>          | 0.0000089 | 157    | 2.51 | 0.153 |
| <i>Eunoe hartmanae</i>              | 0.0000088 | 152    | 3.78 | 0.167 |
| <i>Odontaster meridionalis</i>      | 0.0000087 | 41     | 2.97 | 0.053 |
| <i>Rhincalanus gigas</i>            | 0.0000086 | 166    | 2.15 | 0.135 |
| <i>Tetilla leptoderma</i>           | 0.0000086 | 49     | 2.00 | 0.152 |
| <i>Vibilia antarctica</i>           | 0.0000083 | 91     | 3.56 | 0.142 |
| <i>Vibilia stebbingi</i>            | 0.0000083 | 90     | 3.56 | 0.143 |
| <i>Conchoecia hettacra</i>          | 0.0000078 | 77     | 3.24 | 0.119 |
| <i>Paraeuchaeta antarctica</i>      | 0.0000077 | 171    | 2.21 | 0.135 |
| <i>Rossella antarctica</i>          | 0.0000076 | 43     | 2.00 | 0.157 |
| <i>Rossella tarenja</i>             | 0.0000076 | 43     | 2.00 | 0.157 |
| <i>Salpa thompsoni</i>              | 0.0000075 | 108    | 2.28 | 0.103 |
| <i>Mycale acerata</i>               | 0.0000075 | 44     | 2.00 | 0.156 |
| <i>Nematoflustra flagellata</i>     | 0.0000073 | 31     | 2.00 | 0.125 |
| <i>Flustra antarctica</i>           | 0.0000073 | 31     | 2.00 | 0.125 |
| <i>Calanus propinquus</i>           | 0.0000073 | 165    | 2.15 | 0.135 |
| <i>Calanoides acutus</i>            | 0.0000072 | 166    | 2.17 | 0.136 |
| <i>Euchaetomera antarcticus</i>     | 0.0000071 | 105    | 2.36 | 0.133 |
| <i>Coscinodiscus oculoides</i>      | 0.0000071 | 81     | 1.00 | 0.202 |
| <i>Hyperiella dilatata</i>          | 0.0000068 | 129    | 2.15 | 0.157 |
| <i>Harmothoe crosetensis</i>        | 0.0000068 | 170    | 3.73 | 0.154 |
| <i>Harmotoe hartmanae</i>           | 0.0000068 | 170    | 3.73 | 0.154 |
| <i>Chorismus antarcticus</i>        | 0.0000067 | 213    | 3.14 | 0.139 |
| <i>Limacina helicina antarctica</i> | 0.0000067 | 62     | 3.16 | 0.092 |
| <i>Axociella nidificata</i>         | 0.0000067 | 43     | 2.00 | 0.157 |
| <i>Labidiaster annulatus</i>        | 0.0000065 | 144    | 3.89 | 0.128 |
| <i>Isodyctia toxophila</i>          | 0.0000065 | 43     | 2.00 | 0.157 |
| <i>Isodyctia cavicornuta</i>        | 0.0000065 | 43     | 2.00 | 0.157 |
| <i>Tentorium papillatum</i>         | 0.0000065 | 43     | 2.00 | 0.157 |
| <i>Tentorium semisuberites</i>      | 0.0000065 | 43     | 2.00 | 0.157 |
| <i>Tedania oxedata</i>              | 0.0000065 | 43     | 2.00 | 0.157 |
| <i>Tedania tantulata</i>            | 0.0000065 | 43     | 2.00 | 0.157 |
| <i>Tedania vanhoeffeni</i>          | 0.0000065 | 43     | 2.00 | 0.157 |
| <i>Metridia gerlachei</i>           | 0.0000064 | 166    | 2.15 | 0.134 |
| <i>Isodyctia steifera</i>           | 0.0000064 | 44     | 2.00 | 0.156 |
| <i>Cassidulinoides parkerianus</i>  | 0.0000063 | 86     | 2.00 | 0.124 |

| Species                              | IS_mean   | Degree | TL   | TS    |
|--------------------------------------|-----------|--------|------|-------|
| <i>Haliclona dancoi</i>              | 0.0000062 | 47     | 2.00 | 0.151 |
| <i>Haliclona tenella</i>             | 0.0000062 | 47     | 2.00 | 0.151 |
| <i>Pseudo-Nitzschia liniola</i>      | 0.0000061 | 81     | 1.00 | 0.202 |
| <i>Reteporella hippocrepis</i>       | 0.0000061 | 31     | 2.00 | 0.125 |
| <i>Cibicides refulgens</i>           | 0.0000061 | 89     | 2.00 | 0.129 |
| <i>Globocassidulina crassa</i>       | 0.0000061 | 89     | 2.00 | 0.129 |
| <i>Lenticulina antarctica</i>        | 0.0000060 | 90     | 2.00 | 0.130 |
| <i>Neogloboquadrina pachyderma</i>   | 0.0000058 | 93     | 2.00 | 0.134 |
| <i>Harmothoe spinosa</i>             | 0.0000057 | 212    | 3.72 | 0.146 |
| <i>Nuttallochiton mirandus</i>       | 0.0000056 | 54     | 3.00 | 0.043 |
| <i>Ophiurolepis brevirima</i>        | 0.0000056 | 223    | 3.01 | 0.143 |
| <i>Ophiurolepis gelida</i>           | 0.0000055 | 206    | 2.99 | 0.140 |
| <i>Ophionotus victoriae</i>          | 0.0000055 | 217    | 2.97 | 0.147 |
| <i>Notocrangon antarcticus</i>       | 0.0000054 | 178    | 2.88 | 0.101 |
| <i>Iophon radiatus</i>               | 0.0000054 | 43     | 2.00 | 0.157 |
| <i>Clathria pauper</i>               | 0.0000054 | 43     | 2.00 | 0.157 |
| <i>Primnoisis antarctica</i>         | 0.0000053 | 39     | 3.52 | 0.117 |
| <i>Fasciculiporoides ramosa</i>      | 0.0000053 | 31     | 2.00 | 0.125 |
| <i>Calyx arcuarius</i>               | 0.0000053 | 44     | 2.00 | 0.156 |
| <i>Homaxinella balfourensis</i>      | 0.0000051 | 47     | 2.00 | 0.155 |
| <i>Ophioceres incipiens</i>          | 0.0000050 | 154    | 2.69 | 0.120 |
| <i>Astrochlamys bruneus</i>          | 0.0000050 | 37     | 3.52 | 0.095 |
| <i>Odontaster validus</i>            | 0.0000050 | 234    | 3.30 | 0.143 |
| <i>Flustra angusta</i>               | 0.0000047 | 31     | 2.00 | 0.125 |
| <i>Camptoplites tricornis</i>        | 0.0000047 | 31     | 2.00 | 0.125 |
| <i>Melicerita obliqua</i>            | 0.0000047 | 31     | 2.00 | 0.125 |
| <i>Isoschizoporella tricuspis</i>    | 0.0000047 | 31     | 2.00 | 0.125 |
| <i>Caulastraea curvata</i>           | 0.0000047 | 31     | 2.00 | 0.125 |
| <i>Chondriovelum adeliense</i>       | 0.0000047 | 31     | 2.00 | 0.125 |
| <i>Bathydorus spinosus</i>           | 0.0000047 | 43     | 2.00 | 0.157 |
| <i>Phorbas areolatus</i>             | 0.0000047 | 43     | 2.00 | 0.157 |
| <i>Phorbas glaberrima</i>            | 0.0000047 | 43     | 2.00 | 0.157 |
| <i>Pseudo-Nitzschia subcurvata</i>   | 0.0000047 | 81     | 1.00 | 0.202 |
| <i>Tritoniella belli</i>             | 0.0000046 | 87     | 2.98 | 0.085 |
| <i>Manguinea fusiformis</i>          | 0.0000046 | 81     | 1.00 | 0.202 |
| <i>Conchoecia antipoda</i>           | 0.0000045 | 135    | 2.33 | 0.142 |
| <i>Latrunculia apicalis</i>          | 0.0000045 | 43     | 2.00 | 0.157 |
| <i>Latrunculia brevis</i>            | 0.0000045 | 43     | 2.00 | 0.157 |
| <i>Ophioperla ludwigi</i>            | 0.0000045 | 97     | 3.36 | 0.114 |
| <i>Pseudo-Nitzschia heimii</i>       | 0.0000045 | 81     | 1.00 | 0.202 |
| <i>Polymastia isidis</i>             | 0.0000044 | 43     | 2.00 | 0.157 |
| <i>Gorgonocephalus chiliensis</i>    | 0.0000044 | 25     | 3.17 | 0.080 |
| <i>Polymastia invaginata</i>         | 0.0000044 | 44     | 2.00 | 0.156 |
| <i>Trophon longstaffi</i>            | 0.0000044 | 34     | 3.00 | 0.098 |
| <i>Ekmocucumis turqueti turqueti</i> | 0.0000043 | 16     | 2.00 | 0.110 |
| <i>Gersemia antarctica</i>           | 0.0000043 | 87     | 2.08 | 0.132 |
| <i>Eucranta mollis</i>               | 0.0000043 | 68     | 2.00 | 0.158 |
| <i>Austrodoris kerguelenensis</i>    | 0.0000041 | 36     | 3.00 | 0.098 |
| <i>Fissidentalium majorinum</i>      | 0.0000040 | 6      | 2.00 | 0.035 |
| <i>Stellarima microtrias</i>         | 0.0000040 | 81     | 1.00 | 0.202 |
| <i>Luidiaster gerlachei</i>          | 0.0000039 | 18     | 3.76 | 0.083 |
| <i>Porosira pseudodenticulata</i>    | 0.0000039 | 81     | 1.00 | 0.202 |

| Species                               | IS_mean   | Degree | TL   | TS    |
|---------------------------------------|-----------|--------|------|-------|
| <i>Nematocarcinus lanceopes</i>       | 0.0000039 | 90     | 2.39 | 0.111 |
| <i>Pontiothauma ergata</i>            | 0.0000037 | 41     | 4.24 | 0.117 |
| <i>Thalassiosira tumida</i>           | 0.0000036 | 81     | 1.00 | 0.202 |
| <i>Thalassiosira ritscheri</i>        | 0.0000036 | 81     | 1.00 | 0.202 |
| <i>Thalassiosira lentiginosa</i>      | 0.0000036 | 81     | 1.00 | 0.202 |
| <i>Peraeospinosus pushkini</i>        | 0.0000034 | 104    | 2.36 | 0.101 |
| <i>Austroflustra vulgaris</i>         | 0.0000034 | 31     | 2.00 | 0.125 |
| <i>Barrukia cristata</i>              | 0.0000034 | 99     | 3.71 | 0.150 |
| <i>Nitzschia lecointei</i>            | 0.0000034 | 81     | 1.00 | 0.202 |
| <i>Molgula pedunculata</i>            | 0.0000033 | 5      | 2.00 | 0.048 |
| <i>Harpovoluta charcoti</i>           | 0.0000033 | 79     | 3.02 | 0.089 |
| <i>Actinocyclus actinochilus</i>      | 0.0000033 | 81     | 1.00 | 0.202 |
| <i>Cinachyra barbata</i>              | 0.0000031 | 43     | 2.00 | 0.157 |
| <i>Cinachyra antarctica</i>           | 0.0000031 | 44     | 2.00 | 0.157 |
| <i>Bathydoris clavigera</i>           | 0.0000031 | 46     | 3.16 | 0.107 |
| <i>Bathyplores gourdoni</i>           | 0.0000031 | 17     | 2.00 | 0.111 |
| <i>Bathyplores bongraini</i>          | 0.0000031 | 17     | 2.00 | 0.111 |
| <i>Porosira glacialis</i>             | 0.0000031 | 81     | 1.00 | 0.202 |
| <i>Gnathia calva</i>                  | 0.0000031 | 48     | 3.56 | 0.126 |
| <i>Lageneschara lyrulata</i>          | 0.0000030 | 31     | 2.00 | 0.125 |
| <i>Bostrychopora dentata</i>          | 0.0000030 | 31     | 2.00 | 0.125 |
| <i>Solaster dawsoni</i>               | 0.0000030 | 29     | 3.72 | 0.079 |
| <i>Tubularia ralphii</i>              | 0.0000029 | 53     | 3.44 | 0.122 |
| <i>Corella eumyota</i>                | 0.0000029 | 5      | 2.00 | 0.048 |
| <i>Aplidium vastum</i>                | 0.0000029 | 5      | 2.00 | 0.048 |
| <i>Laternula elliptica</i>            | 0.0000029 | 30     | 2.00 | 0.094 |
| <i>Aporocidaris milleri</i>           | 0.0000029 | 60     | 3.31 | 0.075 |
| <i>Astrotoma agassizii</i>            | 0.0000028 | 223    | 2.86 | 0.123 |
| <i>Echiniphimedia hodgsoni</i>        | 0.0000028 | 83     | 2.97 | 0.129 |
| <i>Acodontaster conspicuus</i>        | 0.0000028 | 13     | 3.00 | 0.042 |
| <i>Thalassiosira gracilis expecta</i> | 0.0000028 | 81     | 1.00 | 0.202 |
| <i>Ekmocucumis steineni</i>           | 0.0000028 | 16     | 2.00 | 0.110 |
| <i>Ekmocucumis turqueti</i>           | 0.0000028 | 16     | 2.00 | 0.110 |
| <i>Synoicum adareanum</i>             | 0.0000027 | 5      | 2.00 | 0.048 |
| <i>Acodontaster hodgsoni</i>          | 0.0000027 | 13     | 3.00 | 0.042 |
| <i>Actinocyclus spiritus</i>          | 0.0000027 | 81     | 1.00 | 0.202 |
| <i>Limopsis marionensis</i>           | 0.0000027 | 29     | 2.00 | 0.094 |
| <i>Notocidaris mortenseni</i>         | 0.0000026 | 54     | 3.00 | 0.046 |
| <i>Molpadia musculus</i>              | 0.0000026 | 17     | 2.00 | 0.111 |
| <i>Chiridota weddellensis</i>         | 0.0000026 | 17     | 2.00 | 0.111 |
| <i>Ctenocidaris spinosa</i>           | 0.0000026 | 75     | 3.25 | 0.075 |
| <i>Acodontaster capitatus</i>         | 0.0000025 | 13     | 3.00 | 0.042 |
| <i>Notaeolidia gigas</i>              | 0.0000025 | 28     | 3.90 | 0.105 |
| <i>Proboscia truncata</i>             | 0.0000025 | 81     | 1.00 | 0.202 |
| <i>Gnathiphimedia mandibularis</i>    | 0.0000025 | 102    | 3.00 | 0.115 |
| <i>Phyllocomus crocea</i>             | 0.0000025 | 66     | 2.00 | 0.152 |
| <i>Azpeitia tabularis</i>             | 0.0000025 | 81     | 1.00 | 0.202 |
| <i>Salpa gerlachei</i>                | 0.0000025 | 76     | 2.08 | 0.089 |
| <i>Ihlea racovitzai</i>               | 0.0000025 | 76     | 2.08 | 0.089 |
| <i>Promachocrinus kerguelensis</i>    | 0.0000025 | 8      | 2.00 | 0.055 |
| <i>Cephalodiscus</i>                  | 0.0000024 | 4      | 2.00 | 0.038 |
| <i>Manguinea rigida</i>               | 0.0000024 | 81     | 1.00 | 0.202 |

| Species                                | IS_mean   | Degree | TL   | TS    |
|----------------------------------------|-----------|--------|------|-------|
| <i>Iphimediella cyclogena</i>          | 0.0000024 | 86     | 3.44 | 0.115 |
| <i>Rhizosolenia antennata</i>          | 0.0000023 | 81     | 1.00 | 0.202 |
| <i>Eucampia antarctica</i>             | 0.0000023 | 81     | 1.00 | 0.202 |
| <i>Anthometra adriani</i>              | 0.0000023 | 7      | 2.00 | 0.047 |
| <i>Nacella concinna</i>                | 0.0000022 | 21     | 3.00 | 0.083 |
| <i>Tritonia antarctica</i>             | 0.0000022 | 28     | 2.50 | 0.104 |
| <i>Maxilliphimedia longipes</i>        | 0.0000022 | 60     | 3.26 | 0.136 |
| <i>Thalassiosira trifulta</i>          | 0.0000022 | 81     | 1.00 | 0.202 |
| <i>Pista spinifera</i>                 | 0.0000022 | 66     | 2.00 | 0.152 |
| <i>Terebella ehlersi</i>               | 0.0000022 | 66     | 2.00 | 0.152 |
| <i>Nitzschia kerguelensis</i>          | 0.0000022 | 81     | 1.00 | 0.202 |
| <i>Odontella weissflogii</i>           | 0.0000022 | 81     | 1.00 | 0.202 |
| <i>Neobuccinum eatoni</i>              | 0.0000022 | 34     | 3.00 | 0.100 |
| <i>Marseniopsis mollis</i>             | 0.0000021 | 28     | 3.00 | 0.103 |
| <i>Marseniopsis conica</i>             | 0.0000021 | 28     | 3.00 | 0.103 |
| <i>Alexandrella mixta</i>              | 0.0000021 | 59     | 3.92 | 0.142 |
| <i>Ophioperla koehlerii</i>            | 0.0000021 | 21     | 2.00 | 0.075 |
| <i>Perknaster fuscus antarcticus</i>   | 0.0000021 | 10     | 2.67 | 0.055 |
| <i>Thalassiosira gravida</i>           | 0.0000021 | 81     | 1.00 | 0.202 |
| <i>Amauropsis rossiana</i>             | 0.0000021 | 30     | 3.32 | 0.105 |
| <i>Paramoera walkeri</i>               | 0.0000020 | 60     | 3.92 | 0.143 |
| <i>Ypsilocucumis turricata</i>         | 0.0000020 | 17     | 2.00 | 0.111 |
| <i>Actinocyclus utricularis</i>        | 0.0000020 | 81     | 1.00 | 0.202 |
| <i>Banquisia belgicae</i>              | 0.0000020 | 81     | 1.00 | 0.202 |
| <i>Chaetoceros concavicornis</i>       | 0.0000020 | 81     | 1.00 | 0.202 |
| <i>Chaetoceros criophilum</i>          | 0.0000020 | 81     | 1.00 | 0.202 |
| <i>Corethron criophilum</i>            | 0.0000020 | 81     | 1.00 | 0.202 |
| <i>Monocaulus parvula</i>              | 0.0000020 | 115    | 2.37 | 0.145 |
| <i>Pseudo-Nitzschia prolongatoides</i> | 0.0000020 | 81     | 1.00 | 0.202 |
| <i>Thalassiosira frenguelliopsis</i>   | 0.0000020 | 81     | 1.00 | 0.202 |
| <i>Ascidia challengerii</i>            | 0.0000019 | 5      | 2.00 | 0.048 |
| <i>Thalassiosira australis</i>         | 0.0000018 | 81     | 1.00 | 0.202 |
| <i>Thalassiosira gracilis</i>          | 0.0000018 | 81     | 1.00 | 0.202 |
| <i>Lysasterias perrieri</i>            | 0.0000018 | 30     | 3.46 | 0.088 |
| <i>Alcyonium antarcticum</i>           | 0.0000017 | 23     | 1.00 | 0.096 |
| <i>Primnoella</i>                      | 0.0000017 | 23     | 2.00 | 0.102 |
| <i>Ainigmaptilon antarcticus</i>       | 0.0000017 | 23     | 2.00 | 0.102 |
| <i>Armadillologorgia cyathella</i>     | 0.0000017 | 23     | 2.00 | 0.102 |
| <i>Yolida eightsi</i>                  | 0.0000017 | 37     | 2.00 | 0.102 |
| <i>Chaetoceros flexuosum</i>           | 0.0000017 | 81     | 1.00 | 0.202 |
| <i>Ctenocidaris perrieri</i>           | 0.0000017 | 68     | 3.27 | 0.067 |
| <i>Glyptonotus antarcticus</i>         | 0.0000017 | 121    | 3.88 | 0.117 |
| <i>Proboscia alata</i>                 | 0.0000016 | 81     | 1.00 | 0.202 |
| <i>Ctenocidaris gigantea</i>           | 0.0000016 | 70     | 3.27 | 0.071 |
| <i>Cadulus dalli antarcticum</i>       | 0.0000016 | 6      | 2.00 | 0.035 |
| <i>Sterechinus neumayeri</i>           | 0.0000016 | 141    | 2.68 | 0.119 |
| <i>Ctenocidaris gilberti</i>           | 0.0000016 | 53     | 3.00 | 0.042 |
| <i>Momoculodes scabriculosus</i>       | 0.0000016 | 49     | 2.00 | 0.144 |
| <i>Pseudorchomene coatsi</i>           | 0.0000016 | 49     | 2.00 | 0.144 |
| <i>Abyssocucumis liouvillei</i>        | 0.0000016 | 16     | 2.00 | 0.110 |
| <i>Pyura setosa</i>                    | 0.0000016 | 5      | 2.00 | 0.048 |
| <i>Isotealia antarctica</i>            | 0.0000015 | 74     | 2.21 | 0.106 |



| Species                              | IS_mean   | Degree | TL   | TS    |
|--------------------------------------|-----------|--------|------|-------|
| <i>Proboscia inermi</i>              | 0.0000015 | 81     | 1.00 | 0.202 |
| <i>Achlyonice violaecuspidata</i>    | 0.0000015 | 17     | 2.00 | 0.111 |
| <i>Pteraster affinis aculeatus</i>   | 0.0000015 | 12     | 3.00 | 0.042 |
| <i>Taeniogyrus contortus</i>         | 0.0000014 | 20     | 2.00 | 0.110 |
| <i>Pelagobia longicirrata</i>        | 0.0000014 | 137    | 2.12 | 0.132 |
| <i>Pyura tunicata</i>                | 0.0000014 | 5      | 2.00 | 0.048 |
| <i>Parschisturella ceruviata</i>     | 0.0000014 | 45     | 2.00 | 0.139 |
| <i>Austrocidaris canaliculata</i>    | 0.0000014 | 25     | 3.77 | 0.030 |
| <i>Psolus dubiosus</i>               | 0.0000014 | 16     | 2.00 | 0.110 |
| <i>Psolus antarcticus</i>            | 0.0000014 | 16     | 2.00 | 0.110 |
| <i>Clavularia frankiliana</i>        | 0.0000014 | 101    | 2.35 | 0.138 |
| <i>Pyura discoveryi</i>              | 0.0000014 | 5      | 2.00 | 0.048 |
| <i>Propeleda longicaudata</i>        | 0.0000014 | 25     | 2.00 | 0.073 |
| <i>Chaetoceros bulbosum</i>          | 0.0000014 | 81     | 1.00 | 0.202 |
| <i>Chaetoceros dichæta</i>           | 0.0000014 | 81     | 1.00 | 0.202 |
| <i>Chaetoceros pelagicus</i>         | 0.0000014 | 81     | 1.00 | 0.202 |
| <i>Fragilariopsis separanda</i>      | 0.0000014 | 81     | 1.00 | 0.202 |
| <i>Baseodiscus antarcticus</i>       | 0.0000013 | 90     | 3.53 | 0.070 |
| <i>Lineus longifissus</i>            | 0.0000013 | 90     | 3.53 | 0.070 |
| <i>Parborlasia corrugatus</i>        | 0.0000013 | 90     | 3.53 | 0.070 |
| <i>Vanadis antarctica</i>            | 0.0000013 | 140    | 2.34 | 0.165 |
| <i>Psolus charcoti</i>               | 0.0000013 | 16     | 2.00 | 0.110 |
| <i>Cuenotaster involutus</i>         | 0.0000013 | 8      | 2.00 | 0.061 |
| <i>Newnesia antarctica</i>           | 0.0000013 | 28     | 2.00 | 0.114 |
| <i>Marginella ealesa</i>             | 0.0000013 | 28     | 2.00 | 0.114 |
| <i>Fragilariopsis linearis</i>       | 0.0000013 | 81     | 1.00 | 0.202 |
| <i>Fragilariopsis nana</i>           | 0.0000013 | 81     | 1.00 | 0.202 |
| <i>Fragilariopsis obliquecostata</i> | 0.0000013 | 81     | 1.00 | 0.202 |
| <i>Fragilariopsis rhombica</i>       | 0.0000013 | 81     | 1.00 | 0.202 |
| <i>Fragilariopsis ritscheri</i>      | 0.0000013 | 81     | 1.00 | 0.202 |
| <i>Silicularia rosea</i>             | 0.0000013 | 118    | 2.37 | 0.143 |
| <i>Mesothuria lactea</i>             | 0.0000012 | 17     | 2.00 | 0.111 |
| Arcturidae                           | 0.0000012 | 30     | 2.00 | 0.117 |
| <i>Notasterias armata</i>            | 0.0000012 | 12     | 3.00 | 0.042 |
| <i>Pyura bouvetensis</i>             | 0.0000012 | 5      | 2.00 | 0.048 |
| <i>Diplasterias brucei</i>           | 0.0000012 | 29     | 3.83 | 0.052 |
| <i>Fragilariopsis kerguelensis</i>   | 0.0000012 | 81     | 1.00 | 0.202 |
| <i>Notasterias stylophora</i>        | 0.0000012 | 12     | 3.00 | 0.042 |
| <i>Trichotoxon reinboldii</i>        | 0.0000011 | 81     | 1.00 | 0.202 |
| <i>Psolidium incertum</i>            | 0.0000011 | 17     | 2.00 | 0.111 |
| <i>Trachythyone parva</i>            | 0.0000011 | 17     | 2.00 | 0.111 |
| <i>Pseudostichopus mollis</i>        | 0.0000011 | 17     | 2.00 | 0.111 |
| <i>Pseudostichopus villosus</i>      | 0.0000011 | 17     | 2.00 | 0.111 |
| <i>Falsimargarita gemma</i>          | 0.0000011 | 28     | 2.00 | 0.114 |
| <i>Lophaster gaini</i>               | 0.0000011 | 12     | 3.00 | 0.042 |
| <i>Limopsis lillei</i>               | 0.0000011 | 29     | 2.00 | 0.094 |
| <i>Sterechinus antarcticus</i>       | 0.0000010 | 121    | 2.47 | 0.101 |
| <i>Aega antarctica</i>               | 0.0000010 | 30     | 2.00 | 0.117 |
| <i>Anthomastus bathyproctus</i>      | 0.0000010 | 84     | 2.02 | 0.133 |
| <i>Edwardsia meridionalis</i>        | 0.0000010 | 75     | 2.15 | 0.113 |
| <i>Isosicyonis alba</i>              | 0.0000010 | 75     | 2.15 | 0.113 |
| <i>Macroptychaster accrescens</i>    | 0.0000010 | 46     | 3.80 | 0.076 |

| Species                     | IS_mean   | Degree | TL   | TS    |
|-----------------------------|-----------|--------|------|-------|
| Fragilariopsis sublinearis  | 0.0000010 | 81     | 1.00 | 0.202 |
| Scotoplanes globosa         | 0.0000010 | 17     | 2.00 | 0.111 |
| Austrosignum grande         | 0.0000009 | 89     | 2.00 | 0.138 |
| Chaetoceros neglectum       | 0.0000009 | 81     | 1.00 | 0.202 |
| Fragilariopsis curta        | 0.0000009 | 81     | 1.00 | 0.202 |
| Fragilariopsis pseudonana   | 0.0000009 | 81     | 1.00 | 0.202 |
| Fragilariopsis vanheurckii  | 0.0000009 | 81     | 1.00 | 0.202 |
| Nitzschia neglecta          | 0.0000009 | 81     | 1.00 | 0.202 |
| Sediment                    | 0.0000009 | 57     | 1.00 | 0.064 |
| Ophiacantha antarctica      | 0.0000009 | 90     | 2.16 | 0.125 |
| Echinopsolus acanthocola    | 0.0000009 | 16     | 2.00 | 0.110 |
| Laetmogone wyvillethompsoni | 0.0000008 | 17     | 2.00 | 0.111 |
| Elpidia glacialis           | 0.0000008 | 17     | 2.00 | 0.111 |
| Ampelisca richardsoni       | 0.0000008 | 108    | 2.00 | 0.159 |
| Sycozoa sigillinoides       | 0.0000008 | 5      | 2.00 | 0.048 |
| Perknaster densus           | 0.0000008 | 7      | 2.00 | 0.060 |
| Alacia hettacra             | 0.0000007 | 124    | 2.08 | 0.130 |
| Alacia belgicae             | 0.0000007 | 124    | 2.08 | 0.130 |
| Metaconchoecia isocheira    | 0.0000007 | 124    | 2.08 | 0.130 |
| Boroecia antipoda           | 0.0000007 | 124    | 2.08 | 0.130 |
| Gyrodinium lachryama        | 0.0000007 | 35     | 2.00 | 0.107 |
| Cylindrotheca closterium    | 0.0000007 | 81     | 1.00 | 0.202 |
| Lissarca notorcadensis      | 0.0000007 | 32     | 2.00 | 0.094 |
| Oswaldella antarctica       | 0.0000007 | 93     | 2.00 | 0.128 |
| Cycethra verrucosa mawsoni  | 0.0000007 | 7      | 2.00 | 0.060 |
| Rhynchonereella bongraini   | 0.0000007 | 84     | 2.12 | 0.114 |
| Bathybiaster loripes        | 0.0000007 | 101    | 2.67 | 0.131 |
| Notioceramus anomalus       | 0.0000007 | 7      | 2.00 | 0.060 |
| Navicula glaciei            | 0.0000007 | 81     | 1.00 | 0.202 |
| Navicula schefferae         | 0.0000007 | 81     | 1.00 | 0.202 |
| Perknaster sladeni          | 0.0000006 | 7      | 2.00 | 0.060 |
| Fragilariopsis cylindrus    | 0.0000006 | 81     | 1.00 | 0.202 |
| Thalassiosira antarctica    | 0.0000006 | 81     | 1.00 | 0.202 |
| Liothyrella uva             | 0.0000006 | 2      | 2.00 | 0.041 |
| Liothyrella uva antarctica  | 0.0000006 | 2      | 2.00 | 0.041 |
| Magellania fragilis         | 0.0000006 | 2      | 2.00 | 0.041 |
| Natatolana oculata          | 0.0000006 | 30     | 2.00 | 0.117 |
| Natatolana meridionalis     | 0.0000006 | 31     | 2.00 | 0.117 |
| Natatolana obtusata         | 0.0000006 | 31     | 2.00 | 0.116 |
| Parmaphorella mawsoni       | 0.0000005 | 86     | 2.00 | 0.128 |
| Cyclocardia astartoides     | 0.0000005 | 18     | 2.00 | 0.075 |
| Amphidinium hadai           | 0.0000005 | 35     | 2.00 | 0.107 |
| Kampylaster incurvatus      | 0.0000004 | 7      | 2.00 | 0.060 |
| Oradarea edentata           | 0.0000004 | 115    | 2.08 | 0.154 |
| Djerboa furcipes            | 0.0000004 | 116    | 2.08 | 0.154 |
| Haplocheira plumosa         | 0.0000004 | 115    | 2.08 | 0.156 |
| Diastylis mawsoni           | 0.0000004 | 8      | 2.00 | 0.044 |
| Ekleptostylis debroyeri     | 0.0000004 | 8      | 2.00 | 0.044 |
| Munna globicauda            | 0.0000004 | 30     | 2.00 | 0.117 |
| Porania antarctica          | 0.0000004 | 72     | 2.12 | 0.108 |
| Nototanais dimorphus        | 0.0000004 | 69     | 2.00 | 0.104 |
| Porania antarctica glabra   | 0.0000004 | 72     | 2.12 | 0.108 |

| Species                             | IS_mean   | Degree | TL   | TS    |
|-------------------------------------|-----------|--------|------|-------|
| Nototanais antarcticus              | 0.0000004 | 70     | 2.00 | 0.105 |
| Chaetoceros socialis                | 0.0000003 | 81     | 1.00 | 0.202 |
| Magellania joubini                  | 0.0000003 | 2      | 2.00 | 0.041 |
| Compsothyris racovitzae             | 0.0000003 | 2      | 2.00 | 0.041 |
| Golfingia margaritacea margaritacea | 0.0000003 | 2      | 2.00 | 0.047 |
| Phytodetritus                       | 0.0000002 | 226    | 1.00 | 0.094 |
| Alomasoma belyaevi                  | 0.0000002 | 2      | 2.00 | 0.047 |
| Phascolion strombi                  | 0.0000002 | 2      | 2.00 | 0.047 |
| Golfingia nordenskojoeldi           | 0.0000002 | 2      | 2.00 | 0.047 |
| Crania lecointei                    | 0.0000002 | 2      | 2.00 | 0.041 |
| Hamingia                            | 0.0000001 | 2      | 2.00 | 0.047 |
| Camylaspis maculata                 | 0.0000001 | 66     | 2.00 | 0.097 |
| Maxmuelleria faex                   | 0.0000001 | 2      | 2.00 | 0.047 |
| Eudorella splendida                 | 0.0000001 | 68     | 2.00 | 0.102 |
| Vaunthompsonia indermis             | 0.0000001 | 68     | 2.00 | 0.102 |
| Golfingia anderssoni                | 0.0000001 | 2      | 2.00 | 0.047 |
| Golfingia ohlini                    | 0.0000001 | 2      | 2.00 | 0.047 |
| Golfingia mawsoni                   | 0.0000001 | 2      | 2.00 | 0.047 |
| Echiurus antarcticus                | 0.0000001 | 2      | 2.00 | 0.047 |
| Dictyocha speculum                  | 0.0000001 | 30     | 1.00 | 0.110 |
| Bodo saltans                        | 0.0000000 | 32     | 3.00 | 0.108 |
| Phaeocystis antarctica              | 0.0000000 | 30     | 1.00 | 0.110 |
| Silicioflagellata                   | 0.0000000 | 30     | 1.00 | 0.110 |
| Abatus curvidens                    | 0.0000000 | 2      | 2.00 | 0.039 |
| Abatus shackeltoni                  | 0.0000000 | 2      | 2.00 | 0.039 |
| Abatus cavernosus                   | 0.0000000 | 2      | 2.00 | 0.039 |
| Abatus nimrodi                      | 0.0000000 | 2      | 2.00 | 0.039 |

## Extinction simulations and stability

We performed extinction simulations, one at a time, for every species in the Weddell Sea food web. In order to assess the impact on the stability of the food web we statistically compared a stability index before and after performing the extinction. For this, we applied Quasi-Sign Stability  $QSS$  that calculates the proportion of matrices that are locally stable. These matrices are created by sampling the values of the community matrix (the Jacobian) from a uniform distribution, preserving the sign structure: positive for predators and negative for prey. This stability index was originally proposed by Allesina and Pascual (2008). We used the R package multiweb to calculate  $QSS$  and to test the  $QSS$  difference before and after performing the extinction (Saravia, 2019). Two functions were specifically created for these analyses: ‘calc\_QSS’ and ‘calc\_QSS\_extinction\_dif’. For the  $QSS$  calculation we used a uniform distribution between 0 and maximum values given by the parameters  $negative * -x$ ,  $positive * x$ ,  $self - damping * x$ , where  $x$  is the value of the strength for the interaction in question. We performed 1000 extinction simulations for every species. Our results showed that the proportion of Jacobians that were locally stable was zero. Thus, we considered the mean maximum eigenvalue as the stability index, hereafter  $QSS$ . For testing the  $QSS$  difference before and after the extinction we performed an Anderson-Darling test considering a p-value < 0.01 (Scholz and Stephens 1987).

Table 2 summarizes the  $QSS$  results for every species extinction of the Weddell Sea food web.

Table 2: Summary of Quasi-Sign Stability (QSS) results before and after performing extinction simulations in the Weddell Sea food web. Ordered by increasing p-values of the Anderson-Darling test. QSS\_all = Mean Quasi-Sign Stability before the extinction (whole food web), QSS\_ext = Mean Quasi-Sign Stability after the extinction, difQSS = QSS difference between ‘QSS\_all’ and ‘QSS\_ext’, AD\_pvalue = p-value for the Anderson-Darling test.

| Species                        | QSS_all   | QSS_ext   | difQSS    | AD_pvalue  |
|--------------------------------|-----------|-----------|-----------|------------|
| Orcinus orca                   | 0.0005504 | 0.0005037 | 4.67e-05  | 2.0000e-41 |
| Macrourus holotrachys          | 0.0005504 | 0.0005149 | 3.55e-05  | 2.7314e-23 |
| Pagetopsis macropterus         | 0.0005504 | 0.0005685 | -1.80e-05 | 2.3777e-12 |
| Abyssorhomene nodimanus        | 0.0005504 | 0.0005274 | 2.30e-05  | 8.5197e-10 |
| Dissostichus mawsoni           | 0.0005504 | 0.0005287 | 2.17e-05  | 1.5670e-09 |
| Macrourus whitsoni             | 0.0005504 | 0.0005292 | 2.12e-05  | 3.3043e-08 |
| Hydrurga leptonyx              | 0.0005504 | 0.0005300 | 2.04e-05  | 9.6647e-06 |
| Mesonychoteuthis hamiltoni     | 0.0005504 | 0.0005322 | 1.82e-05  | 4.5869e-05 |
| Champscephalus gunnari         | 0.0005504 | 0.0005321 | 1.83e-05  | 6.7872e-05 |
| Notothenia marmorata           | 0.0005504 | 0.0005345 | 1.60e-05  | 1.2256e-04 |
| Arctocephalus gazella          | 0.0005504 | 0.0005331 | 1.73e-05  | 2.0857e-04 |
| Trematomus pennellii           | 0.0005504 | 0.0005360 | 1.44e-05  | 1.0022e-03 |
| Mirounga leonina               | 0.0005504 | 0.0005364 | 1.41e-05  | 1.2783e-03 |
| Notothenia coriiceps           | 0.0005504 | 0.0005360 | 1.44e-05  | 1.6612e-03 |
| Maxilliphimedia longipes       | 0.0005504 | 0.0005549 | -4.50e-06 | 9.7397e-03 |
| Psychroteuthis glacialis       | 0.0005504 | 0.0005399 | 1.06e-05  | 2.3579e-02 |
| Parvicorbucula socialis        | 0.0005504 | 0.0005536 | -3.20e-06 | 3.1703e-02 |
| Ommatophoca rossii             | 0.0005504 | 0.0005390 | 1.15e-05  | 3.2259e-02 |
| Diplasterias brucei            | 0.0005504 | 0.0005512 | -8.00e-07 | 3.5761e-02 |
| Notasterias armata             | 0.0005504 | 0.0005519 | -1.50e-06 | 4.4090e-02 |
| Trematomus loennbergii         | 0.0005504 | 0.0005416 | 8.80e-06  | 4.4105e-02 |
| Pachyptila desolata            | 0.0005504 | 0.0005397 | 1.07e-05  | 4.5519e-02 |
| Magellania fragilis            | 0.0005504 | 0.0005543 | -3.90e-06 | 4.6226e-02 |
| Pseudorhomene coatsi           | 0.0005504 | 0.0005523 | -1.90e-06 | 4.9689e-02 |
| Molpadia musculus              | 0.0005504 | 0.0005492 | 1.30e-06  | 4.9710e-02 |
| Tentorium papillatum           | 0.0005504 | 0.0005378 | 1.26e-05  | 5.1386e-02 |
| Epimeria robusta               | 0.0005504 | 0.0005505 | -1.00e-07 | 5.4021e-02 |
| Munna globicauda               | 0.0005504 | 0.0005488 | 1.60e-06  | 5.5704e-02 |
| Chionodraco myersi             | 0.0005504 | 0.0005385 | 1.19e-05  | 5.6001e-02 |
| Trematomus hansonii            | 0.0005504 | 0.0005419 | 8.50e-06  | 5.6461e-02 |
| Gymnodraco acuticeps           | 0.0005504 | 0.0005393 | 1.12e-05  | 5.9005e-02 |
| Kondakovia longimana           | 0.0005504 | 0.0005409 | 9.50e-06  | 6.1225e-02 |
| Ascidia challengerii           | 0.0005504 | 0.0005487 | 1.80e-06  | 6.4870e-02 |
| Bostrychopora dentata          | 0.0005504 | 0.0005528 | -2.30e-06 | 6.5496e-02 |
| Gymnoscopelus nicholsi         | 0.0005504 | 0.0005374 | 1.30e-05  | 6.5803e-02 |
| Aporocidaris milleri           | 0.0005504 | 0.0005484 | 2.00e-06  | 7.6558e-02 |
| Corethron criophilum           | 0.0005504 | 0.0005489 | 1.50e-06  | 7.6593e-02 |
| Fulmarus glacialis             | 0.0005504 | 0.0005539 | -3.50e-06 | 8.0093e-02 |
| Primno macropa                 | 0.0005504 | 0.0005517 | -1.20e-06 | 8.2341e-02 |
| Gonatus antarcticus            | 0.0005504 | 0.0005406 | 9.80e-06  | 8.2731e-02 |
| Chiridota weddellensis         | 0.0005504 | 0.0005388 | 1.16e-05  | 8.5019e-02 |
| Thalassiosira gracilis expecta | 0.0005504 | 0.0005486 | 1.90e-06  | 8.6326e-02 |
| Nitzschia neglecta             | 0.0005504 | 0.0005520 | -1.50e-06 | 8.6946e-02 |
| Paraeuchaeta antarctica        | 0.0005504 | 0.0005526 | -2.20e-06 | 8.7927e-02 |

| Species                     | QSS_all   | QSS_ext   | difQSS    | AD_pvalue  |
|-----------------------------|-----------|-----------|-----------|------------|
| Balaenoptera acutorostrata  | 0.0005504 | 0.0005495 | 9.00e-07  | 9.0060e-02 |
| Caulastraera curvata        | 0.0005504 | 0.0005482 | 2.20e-06  | 9.5639e-02 |
| Phaeocystis antarctica      | 0.0005504 | 0.0005530 | -2.50e-06 | 1.1057e-01 |
| Trematomus bernacchii       | 0.0005504 | 0.0005407 | 9.70e-06  | 1.1268e-01 |
| Melphidippa antarctica      | 0.0005504 | 0.0005500 | 4.00e-07  | 1.1369e-01 |
| Lagenorhynchus cruciger     | 0.0005504 | 0.0005541 | -3.60e-06 | 1.1419e-01 |
| Proboscia alata             | 0.0005504 | 0.0005509 | -5.00e-07 | 1.1590e-01 |
| Pareledone antarctica       | 0.0005504 | 0.0005422 | 8.30e-06  | 1.1648e-01 |
| Limopsis lillei             | 0.0005504 | 0.0005493 | 1.10e-06  | 1.1732e-01 |
| Balaenoptera physalus       | 0.0005504 | 0.0005536 | -3.20e-06 | 1.1900e-01 |
| Sterna paradisaea           | 0.0005504 | 0.0005539 | -3.40e-06 | 1.1915e-01 |
| Macroptychaster accrescens  | 0.0005504 | 0.0005532 | -2.80e-06 | 1.1956e-01 |
| Bathydoris clavigera        | 0.0005504 | 0.0005534 | -2.90e-06 | 1.2000e-01 |
| Clione antarctica           | 0.0005504 | 0.0005490 | 1.40e-06  | 1.2135e-01 |
| Nematoflustra flagellata    | 0.0005504 | 0.0005417 | 8.70e-06  | 1.2468e-01 |
| Limopsis marionensis        | 0.0005504 | 0.0005464 | 4.00e-06  | 1.3052e-01 |
| Trematomus nicolai          | 0.0005504 | 0.0005414 | 9.00e-06  | 1.3080e-01 |
| Liothyrella uva antarctica  | 0.0005504 | 0.0005500 | 4.00e-07  | 1.3244e-01 |
| Coscinodiscus oculoides     | 0.0005504 | 0.0005478 | 2.70e-06  | 1.3517e-01 |
| Bathylagus antarcticus      | 0.0005504 | 0.0005422 | 8.30e-06  | 1.4036e-01 |
| Harpovoluta charcoti        | 0.0005504 | 0.0005510 | -6.00e-07 | 1.4080e-01 |
| Abatus curvidens            | 0.0005504 | 0.0005471 | 3.40e-06  | 1.4121e-01 |
| Anthometra adriani          | 0.0005504 | 0.0005535 | -3.10e-06 | 1.4617e-01 |
| Acodontaster conspicuus     | 0.0005504 | 0.0005522 | -1.80e-06 | 1.4965e-01 |
| Psolus charcoti             | 0.0005504 | 0.0005407 | 9.70e-06  | 1.5151e-01 |
| Phascolion strombi          | 0.0005504 | 0.0005475 | 2.90e-06  | 1.5159e-01 |
| Notocrangon antarcticus     | 0.0005504 | 0.0005521 | -1.60e-06 | 1.5231e-01 |
| Newnesia antarctica         | 0.0005504 | 0.0005459 | 4.50e-06  | 1.5797e-01 |
| Oradarea edentata           | 0.0005504 | 0.0005495 | 9.00e-07  | 1.6235e-01 |
| Navicula schefferae         | 0.0005504 | 0.0005507 | -2.00e-07 | 1.6871e-01 |
| Clione limacina             | 0.0005504 | 0.0005466 | 3.80e-06  | 1.7135e-01 |
| Chaetoceros bulbosum        | 0.0005504 | 0.0005408 | 9.60e-06  | 1.7201e-01 |
| Mycale acerata              | 0.0005504 | 0.0005529 | -2.40e-06 | 1.7240e-01 |
| Frontoserolis bouvieri      | 0.0005504 | 0.0005510 | -5.00e-07 | 1.7690e-01 |
| Echiniphimedia hodgsoni     | 0.0005504 | 0.0005520 | -1.60e-06 | 1.7770e-01 |
| Aplidium vastum             | 0.0005504 | 0.0005479 | 2.60e-06  | 1.7942e-01 |
| Abyssorchomene plebs        | 0.0005504 | 0.0005438 | 6.60e-06  | 1.8104e-01 |
| Macronectes giganteus       | 0.0005504 | 0.0005493 | 1.20e-06  | 1.8266e-01 |
| Falsimargarita gemma        | 0.0005504 | 0.0005516 | -1.10e-06 | 1.8292e-01 |
| Ammothea carolinensis       | 0.0005504 | 0.0005519 | -1.40e-06 | 1.8342e-01 |
| Nitzschia leointei          | 0.0005504 | 0.0005438 | 6.60e-06  | 1.8506e-01 |
| Laetmogone wyvillethompsoni | 0.0005504 | 0.0005416 | 8.80e-06  | 1.8803e-01 |
| Themisto gaudichaudii       | 0.0005504 | 0.0005521 | -1.70e-06 | 1.9483e-01 |
| Rossella antarctica         | 0.0005504 | 0.0005513 | -9.00e-07 | 1.9487e-01 |
| Rossella tarenja            | 0.0005504 | 0.0005459 | 4.60e-06  | 1.9665e-01 |
| Trematomus lepidorhinus     | 0.0005504 | 0.0005492 | 1.20e-06  | 1.9802e-01 |
| Porosira pseudodenticulata  | 0.0005504 | 0.0005475 | 2.90e-06  | 2.0309e-01 |
| Macronectes halli           | 0.0005504 | 0.0005405 | 9.90e-06  | 2.0651e-01 |
| Terebella ehlersi           | 0.0005504 | 0.0005549 | -4.50e-06 | 2.0712e-01 |
| Oceanites oceanicus         | 0.0005504 | 0.0005491 | 1.30e-06  | 2.1082e-01 |
| Latrunculia apicalis        | 0.0005504 | 0.0005508 | -4.00e-07 | 2.1278e-01 |
| Colossendeis scotti         | 0.0005504 | 0.0005483 | 2.20e-06  | 2.1328e-01 |

| Species                             | QSS_all   | QSS_ext   | difQSS    | AD_pvalue  |
|-------------------------------------|-----------|-----------|-----------|------------|
| Megaptera novaeangliae              | 0.0005504 | 0.0005465 | 3.90e-06  | 2.1379e-01 |
| Pseudo-Nitzschia prolongatoides     | 0.0005504 | 0.0005489 | 1.60e-06  | 2.1381e-01 |
| Iphimediella cyclogena              | 0.0005504 | 0.0005468 | 3.60e-06  | 2.1869e-01 |
| Pentanympyon antarcticum            | 0.0005504 | 0.0005414 | 9.10e-06  | 2.2014e-01 |
| Desmonema glaciale                  | 0.0005504 | 0.0005479 | 2.60e-06  | 2.2128e-01 |
| Harmotoe hartmanae                  | 0.0005504 | 0.0005462 | 4.20e-06  | 2.2510e-01 |
| Isoschizoporella tricuspis          | 0.0005504 | 0.0005509 | -5.00e-07 | 2.2662e-01 |
| Sterechinus antarcticus             | 0.0005504 | 0.0005454 | 5.00e-06  | 2.2707e-01 |
| Systemopora contracta               | 0.0005504 | 0.0005512 | -7.00e-07 | 2.3017e-01 |
| Aegires albus                       | 0.0005504 | 0.0005404 | 1.00e-05  | 2.3063e-01 |
| Natatolana meridionalis             | 0.0005504 | 0.0005466 | 3.90e-06  | 2.3246e-01 |
| Epimeria macrodonta                 | 0.0005504 | 0.0005498 | 6.00e-07  | 2.3402e-01 |
| Golfingia margaritacea margaritacea | 0.0005504 | 0.0005479 | 2.50e-06  | 2.3601e-01 |
| Eulagisca gigantea                  | 0.0005504 | 0.0005498 | 6.00e-07  | 2.3679e-01 |
| Thalassoica antarctica              | 0.0005504 | 0.0005434 | 7.10e-06  | 2.3838e-01 |
| Sagitta marri                       | 0.0005504 | 0.0005461 | 4.30e-06  | 2.3864e-01 |
| Pagodroma nivea                     | 0.0005504 | 0.0005517 | -1.20e-06 | 2.3992e-01 |
| Liljeborgia georgiana               | 0.0005504 | 0.0005513 | -9.00e-07 | 2.4072e-01 |
| Oswaldella antarctica               | 0.0005504 | 0.0005417 | 8.80e-06  | 2.5027e-01 |
| Procellaria aequinoctialis          | 0.0005504 | 0.0005493 | 1.10e-06  | 2.5057e-01 |
| Rhachotropis antarctica             | 0.0005504 | 0.0005434 | 7.00e-06  | 2.5210e-01 |
| Conchoecia hettacra                 | 0.0005504 | 0.0005495 | 9.00e-07  | 2.5280e-01 |
| Sterna vittata                      | 0.0005504 | 0.0005408 | 9.60e-06  | 2.5487e-01 |
| Artedidraco skottsbergi             | 0.0005504 | 0.0005492 | 1.20e-06  | 2.5741e-01 |
| Lageneschara lyrulata               | 0.0005504 | 0.0005495 | 9.00e-07  | 2.5800e-01 |
| Silicioflagellata                   | 0.0005504 | 0.0005464 | 4.10e-06  | 2.5803e-01 |
| Vibilia antarctica                  | 0.0005504 | 0.0005458 | 4.70e-06  | 2.5831e-01 |
| Pleuragramma antarcticum            | 0.0005504 | 0.0005436 | 6.80e-06  | 2.5835e-01 |
| Golfingia mawsoni                   | 0.0005504 | 0.0005500 | 4.00e-07  | 2.6142e-01 |
| Rossella racovitzae                 | 0.0005504 | 0.0005518 | -1.40e-06 | 2.6274e-01 |
| Proboscia inermi                    | 0.0005504 | 0.0005499 | 5.00e-07  | 2.6312e-01 |
| Moroteuthis ingens                  | 0.0005504 | 0.0005502 | 2.00e-07  | 2.6714e-01 |
| Alcyonium antarcticum               | 0.0005504 | 0.0005479 | 2.50e-06  | 2.6834e-01 |
| Dacodraco hunteri                   | 0.0005504 | 0.0005433 | 7.10e-06  | 2.6854e-01 |
| Gersemia antarctica                 | 0.0005504 | 0.0005428 | 7.60e-06  | 2.6966e-01 |
| Promachocrinus kerguelensis         | 0.0005504 | 0.0005462 | 4.30e-06  | 2.7042e-01 |
| Chionodraco hamatus                 | 0.0005504 | 0.0005491 | 1.30e-06  | 2.7095e-01 |
| Phytodetritus                       | 0.0005504 | 0.0005454 | 5.10e-06  | 2.7109e-01 |
| Harmothoe spinosa                   | 0.0005504 | 0.0005447 | 5.70e-06  | 2.7133e-01 |
| Silicularia rosea                   | 0.0005504 | 0.0005535 | -3.00e-06 | 2.7342e-01 |
| Cylindrotheca closterium            | 0.0005504 | 0.0005445 | 5.90e-06  | 2.7414e-01 |
| Homaxinella balfourensis            | 0.0005504 | 0.0005421 | 8.30e-06  | 2.7484e-01 |
| Thalassiosira gravida               | 0.0005504 | 0.0005477 | 2.70e-06  | 2.7610e-01 |
| Porosira glacialis                  | 0.0005504 | 0.0005492 | 1.30e-06  | 2.8185e-01 |
| Protomyctophum bolini               | 0.0005504 | 0.0005445 | 5.90e-06  | 2.8225e-01 |
| Physeter macrocephalus              | 0.0005504 | 0.0005479 | 2.50e-06  | 2.8229e-01 |
| Pseudo-Nitzschia heimii             | 0.0005504 | 0.0005506 | -2.00e-07 | 2.8321e-01 |
| Melicerita obliqua                  | 0.0005504 | 0.0005463 | 4.10e-06  | 2.8395e-01 |
| Manguinea fusiformis                | 0.0005504 | 0.0005471 | 3.40e-06  | 2.8419e-01 |
| Pseudosagitta gazellae              | 0.0005504 | 0.0005414 | 9.10e-06  | 2.8740e-01 |
| Thalassiosira lentiginosa           | 0.0005504 | 0.0005492 | 1.20e-06  | 2.9166e-01 |
| Pelagobia longicirrata              | 0.0005504 | 0.0005514 | -1.00e-06 | 2.9261e-01 |

| Species                       | QSS_all   | QSS_ext   | difQSS    | AD_pvalue  |
|-------------------------------|-----------|-----------|-----------|------------|
| Eusirus antarcticus           | 0.0005504 | 0.0005492 | 1.20e-06  | 2.9309e-01 |
| Yolida eightsi                | 0.0005504 | 0.0005445 | 5.90e-06  | 2.9379e-01 |
| Thalassiosira gracilis        | 0.0005504 | 0.0005476 | 2.80e-06  | 2.9773e-01 |
| Golfingia anderssoni          | 0.0005504 | 0.0005451 | 5.30e-06  | 2.9972e-01 |
| Acodontaster hodgsoni         | 0.0005504 | 0.0005482 | 2.20e-06  | 3.0012e-01 |
| Laetmonice producta           | 0.0005504 | 0.0005475 | 2.90e-06  | 3.0859e-01 |
| Tritoniella belli             | 0.0005504 | 0.0005452 | 5.20e-06  | 3.0893e-01 |
| Ceratoserolis meridionalis    | 0.0005504 | 0.0005490 | 1.40e-06  | 3.1032e-01 |
| Flustra angusta               | 0.0005504 | 0.0005487 | 1.70e-06  | 3.1575e-01 |
| Eusirus perdentatus           | 0.0005504 | 0.0005427 | 7.70e-06  | 3.1576e-01 |
| Electrona antarctica          | 0.0005504 | 0.0005521 | -1.60e-06 | 3.1614e-01 |
| Eudorella splendida           | 0.0005504 | 0.0005513 | -9.00e-07 | 3.1784e-01 |
| Daption capense               | 0.0005504 | 0.0005483 | 2.10e-06  | 3.1923e-01 |
| Chaetoceros neglectum         | 0.0005504 | 0.0005481 | 2.30e-06  | 3.1975e-01 |
| Neobuccinum eatoni            | 0.0005504 | 0.0005496 | 8.00e-07  | 3.2433e-01 |
| Martialia hyadesi             | 0.0005504 | 0.0005423 | 8.20e-06  | 3.2439e-01 |
| Vaunthompsonia indermis       | 0.0005504 | 0.0005509 | -5.00e-07 | 3.2604e-01 |
| Notioceramus anomalus         | 0.0005504 | 0.0005448 | 5.60e-06  | 3.2613e-01 |
| Dictyocha speculum            | 0.0005504 | 0.0005421 | 8.40e-06  | 3.2716e-01 |
| Periphylla periphylla         | 0.0005504 | 0.0005487 | 1.70e-06  | 3.2754e-01 |
| Marseniopsis conica           | 0.0005504 | 0.0005458 | 4.70e-06  | 3.2923e-01 |
| Pseudosagitta maxima          | 0.0005504 | 0.0005511 | -7.00e-07 | 3.3056e-01 |
| Scotoplanes globosa           | 0.0005504 | 0.0005466 | 3.80e-06  | 3.3130e-01 |
| Ihlea racovitzai              | 0.0005504 | 0.0005507 | -3.00e-07 | 3.3608e-01 |
| Odontella weissflogii         | 0.0005504 | 0.0005425 | 7.90e-06  | 3.3845e-01 |
| Cyclocardia astartoides       | 0.0005504 | 0.0005488 | 1.70e-06  | 3.4142e-01 |
| Proboscia truncata            | 0.0005504 | 0.0005447 | 5.70e-06  | 3.4331e-01 |
| Epimeriella walkeri           | 0.0005504 | 0.0005453 | 5.10e-06  | 3.4533e-01 |
| Kirkpatrickia variolosa       | 0.0005504 | 0.0005429 | 7.50e-06  | 3.4564e-01 |
| Muraenolepis microps          | 0.0005504 | 0.0005420 | 8.50e-06  | 3.4568e-01 |
| Natatolana oculata            | 0.0005504 | 0.0005511 | -7.00e-07 | 3.4743e-01 |
| Alexandrella mixta            | 0.0005504 | 0.0005478 | 2.60e-06  | 3.4849e-01 |
| Galiteuthis glacialis         | 0.0005504 | 0.0005456 | 4.80e-06  | 3.4934e-01 |
| Eunoe spica                   | 0.0005504 | 0.0005447 | 5.70e-06  | 3.4969e-01 |
| Synoicum adareanum            | 0.0005504 | 0.0005486 | 1.80e-06  | 3.5240e-01 |
| Eunoe spica spicoides         | 0.0005504 | 0.0005505 | -1.00e-07 | 3.5305e-01 |
| Euphausia superba             | 0.0005504 | 0.0005420 | 8.50e-06  | 3.5330e-01 |
| Fragilariopsis separanda      | 0.0005504 | 0.0005499 | 5.00e-07  | 3.5391e-01 |
| Marginella ealesa             | 0.0005504 | 0.0005505 | 0.00e+00  | 3.5591e-01 |
| Euphausia crystallorophias    | 0.0005504 | 0.0005418 | 8.60e-06  | 3.5646e-01 |
| Clio pyramidata               | 0.0005504 | 0.0005433 | 7.10e-06  | 3.5820e-01 |
| Nuttallochiton mirandus       | 0.0005504 | 0.0005514 | -1.00e-06 | 3.5852e-01 |
| Sediment                      | 0.0005504 | 0.0005488 | 1.60e-06  | 3.5913e-01 |
| Anthomastus bathyproctus      | 0.0005504 | 0.0005424 | 8.00e-06  | 3.6020e-01 |
| Perknaster fuscus antarcticus | 0.0005504 | 0.0005485 | 1.90e-06  | 3.6370e-01 |
| Psolus dubiosus               | 0.0005504 | 0.0005463 | 4.10e-06  | 3.6458e-01 |
| Actinocyclus spiritus         | 0.0005504 | 0.0005470 | 3.40e-06  | 3.6591e-01 |
| Baseodiscus antarcticus       | 0.0005504 | 0.0005463 | 4.10e-06  | 3.7022e-01 |
| Isodyctia cavicornuta         | 0.0005504 | 0.0005536 | -3.10e-06 | 3.7091e-01 |
| Austroflustra vulgaris        | 0.0005504 | 0.0005509 | -5.00e-07 | 3.7251e-01 |
| Clavularia frankiliana        | 0.0005504 | 0.0005481 | 2.30e-06  | 3.7502e-01 |
| Ampelisca richardsoni         | 0.0005504 | 0.0005440 | 6.40e-06  | 3.7675e-01 |

| Species                      | QSS_all   | QSS_ext   | difQSS    | AD_pvalue  |
|------------------------------|-----------|-----------|-----------|------------|
| Labidiaster annulatus        | 0.0005504 | 0.0005479 | 2.50e-06  | 3.7741e-01 |
| Leptonychotes weddelli       | 0.0005504 | 0.0005438 | 6.60e-06  | 3.7760e-01 |
| Abyssochocumis liouvillei    | 0.0005504 | 0.0005502 | 2.00e-07  | 3.7765e-01 |
| Cnemidocarpa verrucosa       | 0.0005504 | 0.0005488 | 1.60e-06  | 3.7940e-01 |
| Echinopsolus acanthocola     | 0.0005504 | 0.0005494 | 1.00e-06  | 3.8181e-01 |
| Pygoscelis adeliae           | 0.0005504 | 0.0005497 | 7.00e-07  | 3.8563e-01 |
| Tubularia ralphii            | 0.0005504 | 0.0005487 | 1.70e-06  | 3.8565e-01 |
| Gorgonocephalus chiliensis   | 0.0005504 | 0.0005495 | 9.00e-07  | 3.8836e-01 |
| Trophon longstaffi           | 0.0005504 | 0.0005467 | 3.70e-06  | 3.9181e-01 |
| Austrodoris kerguelenensis   | 0.0005504 | 0.0005421 | 8.30e-06  | 3.9208e-01 |
| Pagetopsis maculatus         | 0.0005504 | 0.0005418 | 8.60e-06  | 3.9214e-01 |
| Neogloboquadriana pachyderma | 0.0005504 | 0.0005487 | 1.70e-06  | 3.9235e-01 |
| Abatus cavernosus            | 0.0005504 | 0.0005478 | 2.60e-06  | 3.9640e-01 |
| Fragilariopsis rhombica      | 0.0005504 | 0.0005463 | 4.10e-06  | 3.9653e-01 |
| Polyeunoa laevis             | 0.0005504 | 0.0005455 | 4.90e-06  | 4.0048e-01 |
| Thysanoessa macrura          | 0.0005504 | 0.0005481 | 2.30e-06  | 4.0096e-01 |
| Abyssochomene rossi          | 0.0005504 | 0.0005459 | 4.50e-06  | 4.0222e-01 |
| Haplocheira plumosa          | 0.0005504 | 0.0005456 | 4.80e-06  | 4.0317e-01 |
| Maxmuelleria faex            | 0.0005504 | 0.0005497 | 7.00e-07  | 4.0461e-01 |
| Ophioceres incipiens         | 0.0005504 | 0.0005487 | 1.70e-06  | 4.0568e-01 |
| Parmaphorella mawsoni        | 0.0005504 | 0.0005456 | 4.80e-06  | 4.0569e-01 |
| Rhizosolenia antennata       | 0.0005504 | 0.0005450 | 5.50e-06  | 4.0607e-01 |
| Actinocyclus actinochilus    | 0.0005504 | 0.0005447 | 5.70e-06  | 4.0723e-01 |
| Camptoplites tricornis       | 0.0005504 | 0.0005460 | 4.40e-06  | 4.1012e-01 |
| Serolis polita               | 0.0005504 | 0.0005470 | 3.40e-06  | 4.1242e-01 |
| Fasciculiporoides ramosa     | 0.0005504 | 0.0005448 | 5.60e-06  | 4.1603e-01 |
| Fragilariopsis linearis      | 0.0005504 | 0.0005481 | 2.40e-06  | 4.1706e-01 |
| Pogonophryne barsukovi       | 0.0005504 | 0.0005430 | 7.50e-06  | 4.1846e-01 |
| Tryphosella murrayi          | 0.0005504 | 0.0005492 | 1.30e-06  | 4.2162e-01 |
| Paraceradocus gibber         | 0.0005504 | 0.0005457 | 4.70e-06  | 4.2183e-01 |
| Solmundella bitentaculata    | 0.0005504 | 0.0005515 | -1.00e-06 | 4.2647e-01 |
| Parschisturella ceruviata    | 0.0005504 | 0.0005474 | 3.10e-06  | 4.2862e-01 |
| Cycethra verrucosa mawsoni   | 0.0005504 | 0.0005450 | 5.50e-06  | 4.3024e-01 |
| Alluroteuthis antarcticus    | 0.0005504 | 0.0005491 | 1.30e-06  | 4.3107e-01 |
| Edwardsia meridionalis       | 0.0005504 | 0.0005431 | 7.30e-06  | 4.3211e-01 |
| Bargmannia                   | 0.0005504 | 0.0005508 | -3.00e-07 | 4.3218e-01 |
| Ophionotus victoriae         | 0.0005504 | 0.0005441 | 6.40e-06  | 4.3433e-01 |
| Pseudo-Nitzschia subcurvata  | 0.0005504 | 0.0005484 | 2.00e-06  | 4.3438e-01 |
| Taeniogyrus contortus        | 0.0005504 | 0.0005488 | 1.60e-06  | 4.3832e-01 |
| Cinachyra barbata            | 0.0005504 | 0.0005435 | 6.90e-06  | 4.3842e-01 |
| Salpa gerlachei              | 0.0005504 | 0.0005450 | 5.40e-06  | 4.4149e-01 |
| Notolepis coatsi             | 0.0005504 | 0.0005462 | 4.30e-06  | 4.4150e-01 |
| Laternula elliptica          | 0.0005504 | 0.0005500 | 4.00e-07  | 4.4202e-01 |
| Manguinea rigida             | 0.0005504 | 0.0005481 | 2.30e-06  | 4.4234e-01 |
| Trichotoxon reinboldii       | 0.0005504 | 0.0005456 | 4.80e-06  | 4.4281e-01 |
| Austrosignum grande          | 0.0005504 | 0.0005413 | 9.10e-06  | 4.4508e-01 |
| Gyrodinium lachryama         | 0.0005504 | 0.0005449 | 5.50e-06  | 4.4662e-01 |
| Pteraster affinis aculeatus  | 0.0005504 | 0.0005508 | -3.00e-07 | 4.4762e-01 |
| Dipulmaris antarctica        | 0.0005504 | 0.0005476 | 2.80e-06  | 4.4853e-01 |
| Atolla wyvillei              | 0.0005504 | 0.0005441 | 6.40e-06  | 4.5131e-01 |
| Perknaster densus            | 0.0005504 | 0.0005473 | 3.10e-06  | 4.5149e-01 |
| Ctenocidaris gigantea        | 0.0005504 | 0.0005452 | 5.30e-06  | 4.5367e-01 |



| Species                              | QSS_all   | QSS_ext   | difQSS    | AD_pvalue  |
|--------------------------------------|-----------|-----------|-----------|------------|
| <i>Polymastia isidis</i>             | 0.0005504 | 0.0005449 | 5.50e-06  | 4.5697e-01 |
| <i>Stylocordyla borealis</i>         | 0.0005504 | 0.0005482 | 2.20e-06  | 4.6147e-01 |
| <i>Fragilariopsis pseudonana</i>     | 0.0005504 | 0.0005486 | 1.80e-06  | 4.6227e-01 |
| <i>Ophioperla ludwigi</i>            | 0.0005504 | 0.0005441 | 6.30e-06  | 4.6230e-01 |
| <i>Parborlasia corrugatus</i>        | 0.0005504 | 0.0005461 | 4.30e-06  | 4.6562e-01 |
| <i>Aptenodytes forsteri</i>          | 0.0005504 | 0.0005423 | 8.10e-06  | 4.6701e-01 |
| <i>Gnathiphimedia mandibularis</i>   | 0.0005504 | 0.0005440 | 6.40e-06  | 4.6814e-01 |
| <i>Probuccinum tenuistriatum</i>     | 0.0005504 | 0.0005500 | 4.00e-07  | 4.7029e-01 |
| <i>Phorbas areolatus</i>             | 0.0005504 | 0.0005452 | 5.20e-06  | 4.7034e-01 |
| <i>Ctenocidaris perrieri</i>         | 0.0005504 | 0.0005440 | 6.40e-06  | 4.7235e-01 |
| <i>Iophon radiatus</i>               | 0.0005504 | 0.0005494 | 1.10e-06  | 4.7307e-01 |
| <i>Pseudo-Nitzschia liniola</i>      | 0.0005504 | 0.0005483 | 2.10e-06  | 4.7336e-01 |
| <i>Pyura setosa</i>                  | 0.0005504 | 0.0005513 | -9.00e-07 | 4.7974e-01 |
| <i>Cygnodraco mawsoni</i>            | 0.0005504 | 0.0005484 | 2.00e-06  | 4.8084e-01 |
| <i>Pyura tunicata</i>                | 0.0005504 | 0.0005486 | 1.90e-06  | 4.8148e-01 |
| <i>Camylaspis maculata</i>           | 0.0005504 | 0.0005491 | 1.30e-06  | 4.8303e-01 |
| <i>Phyllocomus crocea</i>            | 0.0005504 | 0.0005504 | 0.00e+00  | 4.8306e-01 |
| <i>Ctenocidaris spinosa</i>          | 0.0005504 | 0.0005454 | 5.00e-06  | 4.8564e-01 |
| <i>Ekmocucumis turqueti turqueti</i> | 0.0005504 | 0.0005441 | 6.30e-06  | 4.8578e-01 |
| <i>Metridia gerlachei</i>            | 0.0005504 | 0.0005476 | 2.90e-06  | 4.8719e-01 |
| <i>Echiurus antarcticus</i>          | 0.0005504 | 0.0005439 | 6.50e-06  | 4.8747e-01 |
| <i>Polymastia invaginata</i>         | 0.0005504 | 0.0005424 | 8.00e-06  | 4.8758e-01 |
| <i>Pogonophryne scotti</i>           | 0.0005504 | 0.0005480 | 2.50e-06  | 4.8812e-01 |
| <i>Achlyonice violaeacuspidata</i>   | 0.0005504 | 0.0005474 | 3.00e-06  | 4.8855e-01 |
| <i>Haliclona tenella</i>             | 0.0005504 | 0.0005457 | 4.70e-06  | 4.8963e-01 |
| <i>Pontiothauma ergata</i>           | 0.0005504 | 0.0005491 | 1.30e-06  | 4.8991e-01 |
| <i>Isodyctia steifera</i>            | 0.0005504 | 0.0005473 | 3.20e-06  | 4.9009e-01 |
| <i>Thalassiosira trifulta</i>        | 0.0005504 | 0.0005465 | 3.90e-06  | 4.9011e-01 |
| <i>Tetilla leptoderma</i>            | 0.0005504 | 0.0005470 | 3.40e-06  | 4.9352e-01 |
| <i>Epimeria similis</i>              | 0.0005504 | 0.0005465 | 3.90e-06  | 4.9671e-01 |
| <i>Nacella concinna</i>              | 0.0005504 | 0.0005470 | 3.40e-06  | 4.9709e-01 |
| <i>Amauropsis rossiana</i>           | 0.0005504 | 0.0005462 | 4.20e-06  | 4.9929e-01 |
| <i>Pachycara brachycephalum</i>      | 0.0005504 | 0.0005492 | 1.20e-06  | 4.9966e-01 |
| <i>Solaster dawsoni</i>              | 0.0005504 | 0.0005471 | 3.30e-06  | 5.0025e-01 |
| <i>Cyllopus lucasii</i>              | 0.0005504 | 0.0005541 | -3.70e-06 | 5.0247e-01 |
| <i>Halobaena caerulea</i>            | 0.0005504 | 0.0005463 | 4.10e-06  | 5.0595e-01 |
| <i>Trachythyone parva</i>            | 0.0005504 | 0.0005479 | 2.50e-06  | 5.0735e-01 |
| <i>Gymnoscopelus opisthopterus</i>   | 0.0005504 | 0.0005453 | 5.10e-06  | 5.1246e-01 |
| <i>Anoxycalyx joubini</i>            | 0.0005504 | 0.0005427 | 7.70e-06  | 5.1300e-01 |
| <i>Chondriovelum adeliense</i>       | 0.0005504 | 0.0005463 | 4.20e-06  | 5.1307e-01 |
| <i>Primnoisis antarctica</i>         | 0.0005504 | 0.0005447 | 5.80e-06  | 5.1314e-01 |
| <i>Salpa thompsoni</i>               | 0.0005504 | 0.0005474 | 3.10e-06  | 5.2102e-01 |
| <i>Bodo saltans</i>                  | 0.0005504 | 0.0005448 | 5.60e-06  | 5.2282e-01 |
| <i>Kampylaster incurvatus</i>        | 0.0005504 | 0.0005499 | 5.00e-07  | 5.2308e-01 |
| <i>Hyperia macrocephala</i>          | 0.0005504 | 0.0005462 | 4.20e-06  | 5.2327e-01 |
| <i>Chaetoceros concavicornis</i>     | 0.0005504 | 0.0005493 | 1.10e-06  | 5.2338e-01 |
| <i>Dolloidraco longedorsalis</i>     | 0.0005504 | 0.0005461 | 4.30e-06  | 5.2556e-01 |
| <i>Epimeria rubrieques</i>           | 0.0005504 | 0.0005503 | 1.00e-07  | 5.2730e-01 |
| <i>Conchoecia antipoda</i>           | 0.0005504 | 0.0005492 | 1.30e-06  | 5.2800e-01 |
| <i>Barrukia cristata</i>             | 0.0005504 | 0.0005437 | 6.80e-06  | 5.2841e-01 |
| <i>Phorbas glaberrima</i>            | 0.0005504 | 0.0005497 | 7.00e-07  | 5.3029e-01 |
| <i>Paramoera walkeri</i>             | 0.0005504 | 0.0005494 | 1.10e-06  | 5.3199e-01 |

| Species                              | QSS_all   | QSS_ext   | difQSS    | AD_pvalue  |
|--------------------------------------|-----------|-----------|-----------|------------|
| <i>Thalassiosira antarctica</i>      | 0.0005504 | 0.0005471 | 3.30e-06  | 5.3362e-01 |
| <i>Pogonophryne phyllopogon</i>      | 0.0005504 | 0.0005484 | 2.00e-06  | 5.3402e-01 |
| <i>Trematomus eulepidotus</i>        | 0.0005504 | 0.0005468 | 3.60e-06  | 5.3809e-01 |
| <i>Thalassiosira tumida</i>          | 0.0005504 | 0.0005443 | 6.10e-06  | 5.3823e-01 |
| <i>Euchaetomera antarcticus</i>      | 0.0005504 | 0.0005502 | 3.00e-07  | 5.3945e-01 |
| <i>Compsothyris racovitzae</i>       | 0.0005504 | 0.0005461 | 4.30e-06  | 5.4038e-01 |
| <i>Nototanais antarcticus</i>        | 0.0005504 | 0.0005450 | 5.40e-06  | 5.4137e-01 |
| <i>Scolymastra joubini</i>           | 0.0005504 | 0.0005465 | 4.00e-06  | 5.4161e-01 |
| <i>Bathydorus spinosus</i>           | 0.0005504 | 0.0005441 | 6.30e-06  | 5.4179e-01 |
| <i>Hyperiella dilatata</i>           | 0.0005504 | 0.0005457 | 4.70e-06  | 5.4181e-01 |
| <i>Pista spinifera</i>               | 0.0005504 | 0.0005483 | 2.10e-06  | 5.4393e-01 |
| <i>Pogonophryne permitini</i>        | 0.0005504 | 0.0005462 | 4.20e-06  | 5.4511e-01 |
| <i>Thalassiosira frenguelliopsis</i> | 0.0005504 | 0.0005470 | 3.40e-06  | 5.4875e-01 |
| <i>Pogonophryne marmorata</i>        | 0.0005504 | 0.0005441 | 6.30e-06  | 5.5353e-01 |
| <i>Austrocidaris canaliculata</i>    | 0.0005504 | 0.0005495 | 9.00e-07  | 5.5401e-01 |
| <i>Fragilariopsis nana</i>           | 0.0005504 | 0.0005473 | 3.10e-06  | 5.5472e-01 |
| <i>Rossella nuda</i>                 | 0.0005504 | 0.0005487 | 1.70e-06  | 5.5606e-01 |
| <i>Fragilariopsis kerguelensis</i>   | 0.0005504 | 0.0005460 | 4.40e-06  | 5.5886e-01 |
| <i>Oediceroides calmani</i>          | 0.0005504 | 0.0005472 | 3.30e-06  | 5.5902e-01 |
| <i>Bathypanoploea schellenbergi</i>  | 0.0005504 | 0.0005462 | 4.20e-06  | 5.5951e-01 |
| <i>Chaetoceros dictyota</i>          | 0.0005504 | 0.0005452 | 5.20e-06  | 5.6397e-01 |
| <i>Haliclona dancoi</i>              | 0.0005504 | 0.0005461 | 4.30e-06  | 5.6781e-01 |
| <i>Calanoides acutus</i>             | 0.0005504 | 0.0005448 | 5.60e-06  | 5.6982e-01 |
| <i>Sycozoa sigillinoides</i>         | 0.0005504 | 0.0005468 | 3.60e-06  | 5.7037e-01 |
| <i>Racovitzia glacialis</i>          | 0.0005504 | 0.0005457 | 4.70e-06  | 5.7081e-01 |
| <i>Euphausia frigida</i>             | 0.0005504 | 0.0005501 | 3.00e-07  | 5.7103e-01 |
| <i>Propeleda longicaudata</i>        | 0.0005504 | 0.0005498 | 6.00e-07  | 5.7325e-01 |
| <i>Chaetoceros pelagicus</i>         | 0.0005504 | 0.0005444 | 6.00e-06  | 5.7443e-01 |
| <i>Fragilariopsis vanheurckii</i>    | 0.0005504 | 0.0005450 | 5.40e-06  | 5.7477e-01 |
| <i>Calyx arcuarius</i>               | 0.0005504 | 0.0005508 | -4.00e-07 | 5.7485e-01 |
| <i>Tedania vanhoeffeni</i>           | 0.0005504 | 0.0005438 | 6.60e-06  | 5.7804e-01 |
| <i>Glyptonotus antarcticus</i>       | 0.0005504 | 0.0005499 | 5.00e-07  | 5.7832e-01 |
| <i>Eunoe hartmanae</i>               | 0.0005504 | 0.0005487 | 1.70e-06  | 5.7907e-01 |
| <i>Ophiurolepis brevirima</i>        | 0.0005504 | 0.0005487 | 1.80e-06  | 5.8260e-01 |
| <i>Lineus longifissus</i>            | 0.0005504 | 0.0005499 | 5.00e-07  | 5.8308e-01 |
| <i>Cinachyra antarctica</i>          | 0.0005504 | 0.0005461 | 4.30e-06  | 5.8492e-01 |
| <i>Acodontaster capitatus</i>        | 0.0005504 | 0.0005454 | 5.00e-06  | 5.8564e-01 |
| <i>Harpagifer antarcticus</i>        | 0.0005504 | 0.0005481 | 2.40e-06  | 5.8681e-01 |
| <i>Antarctomysis maxima</i>          | 0.0005504 | 0.0005456 | 4.80e-06  | 5.8835e-01 |
| <i>Latrunculia brevis</i>            | 0.0005504 | 0.0005451 | 5.30e-06  | 5.8864e-01 |
| <i>Alacia hettacra</i>               | 0.0005504 | 0.0005497 | 7.00e-07  | 5.9069e-01 |
| <i>Bathyploetes gourdoni</i>         | 0.0005504 | 0.0005466 | 3.80e-06  | 5.9145e-01 |
| <i>Reteporella hippocrepis</i>       | 0.0005504 | 0.0005442 | 6.30e-06  | 5.9472e-01 |
| <i>Notocidaris mortenseni</i>        | 0.0005504 | 0.0005505 | 0.00e+00  | 5.9497e-01 |
| <i>Thalassiosira ritscheri</i>       | 0.0005504 | 0.0005465 | 4.00e-06  | 5.9514e-01 |
| <i>Golfingia nordenskojoeldi</i>     | 0.0005504 | 0.0005511 | -7.00e-07 | 5.9596e-01 |
| <i>Bathyploetes bongraini</i>        | 0.0005504 | 0.0005510 | -6.00e-07 | 6.0100e-01 |
| <i>Rhodalia miranda</i>              | 0.0005504 | 0.0005470 | 3.40e-06  | 6.0122e-01 |
| <i>Ainigmaptilon antarcticus</i>     | 0.0005504 | 0.0005472 | 3.20e-06  | 6.0337e-01 |
| <i>Fragilariopsis cylindrus</i>      | 0.0005504 | 0.0005443 | 6.10e-06  | 6.0866e-01 |
| <i>Serolella bouveri</i>             | 0.0005504 | 0.0005450 | 5.50e-06  | 6.1184e-01 |
| <i>Sterechinus neumayeri</i>         | 0.0005504 | 0.0005460 | 4.40e-06  | 6.1345e-01 |

| Species                              | QSS_all   | QSS_ext   | difQSS    | AD_pvalue  |
|--------------------------------------|-----------|-----------|-----------|------------|
| <i>Dimophyes arctica</i>             | 0.0005504 | 0.0005454 | 5.00e-06  | 6.1418e-01 |
| <i>Abatus nimrodi</i>                | 0.0005504 | 0.0005493 | 1.10e-06  | 6.1540e-01 |
| <i>Eucopia australis</i>             | 0.0005504 | 0.0005455 | 4.90e-06  | 6.1708e-01 |
| <i>Heterophoxus videns</i>           | 0.0005504 | 0.0005508 | -3.00e-07 | 6.2556e-01 |
| <i>Odontaster meridionalis</i>       | 0.0005504 | 0.0005459 | 4.50e-06  | 6.2856e-01 |
| <i>Harmothoe crosetensis</i>         | 0.0005504 | 0.0005500 | 4.00e-07  | 6.3432e-01 |
| <i>Gnathia calva</i>                 | 0.0005504 | 0.0005466 | 3.80e-06  | 6.3503e-01 |
| <i>Cryodraco antarcticus</i>         | 0.0005504 | 0.0005439 | 6.50e-06  | 6.3596e-01 |
| <i>Ypsilocucumis turricata</i>       | 0.0005504 | 0.0005479 | 2.50e-06  | 6.3904e-01 |
| <i>Mesothuria lactea</i>             | 0.0005504 | 0.0005457 | 4.70e-06  | 6.3983e-01 |
| <i>Ekmocucumis steineni</i>          | 0.0005504 | 0.0005467 | 3.70e-06  | 6.4189e-01 |
| <i>Azpeitia tabularis</i>            | 0.0005504 | 0.0005476 | 2.80e-06  | 6.4405e-01 |
| <i>Isotealia antarctica</i>          | 0.0005504 | 0.0005469 | 3.50e-06  | 6.4484e-01 |
| <i>Puncturella conica</i>            | 0.0005504 | 0.0005439 | 6.60e-06  | 6.4755e-01 |
| <i>Porania antarctica</i>            | 0.0005504 | 0.0005499 | 5.00e-07  | 6.4899e-01 |
| <i>Psolus antarcticus</i>            | 0.0005504 | 0.0005465 | 3.90e-06  | 6.4976e-01 |
| <i>Urticinopsis antarctica</i>       | 0.0005504 | 0.0005433 | 7.10e-06  | 6.5059e-01 |
| <i>Tentorium semisuberites</i>       | 0.0005504 | 0.0005464 | 4.00e-06  | 6.5062e-01 |
| <i>Ctenocidaris gilberti</i>         | 0.0005504 | 0.0005477 | 2.80e-06  | 6.5096e-01 |
| <i>Arteidraco orianae</i>            | 0.0005504 | 0.0005499 | 5.00e-07  | 6.5118e-01 |
| <i>Clathria pauper</i>               | 0.0005504 | 0.0005485 | 1.90e-06  | 6.5128e-01 |
| <i>Monocaulus parvula</i>            | 0.0005504 | 0.0005453 | 5.10e-06  | 6.5152e-01 |
| <i>Callianira antarctica</i>         | 0.0005504 | 0.0005485 | 1.90e-06  | 6.5862e-01 |
| <i>Pyura bouvetensis</i>             | 0.0005504 | 0.0005449 | 5.60e-06  | 6.6543e-01 |
| <i>Momoculodes scabriculosus</i>     | 0.0005504 | 0.0005513 | -9.00e-07 | 6.6863e-01 |
| <i>Diphyes antarctica</i>            | 0.0005504 | 0.0005455 | 4.90e-06  | 6.6869e-01 |
| <i>Aega antarctica</i>               | 0.0005504 | 0.0005485 | 1.90e-06  | 6.6967e-01 |
| <i>Eukrohnia hamata</i>              | 0.0005504 | 0.0005488 | 1.60e-06  | 6.7051e-01 |
| <i>Notasterias stylophora</i>        | 0.0005504 | 0.0005469 | 3.60e-06  | 6.7055e-01 |
| <i>Ophiurolepis gelida</i>           | 0.0005504 | 0.0005479 | 2.50e-06  | 6.7087e-01 |
| <i>Magellania joubini</i>            | 0.0005504 | 0.0005485 | 1.90e-06  | 6.7115e-01 |
| <i>Pareledone charcoti</i>           | 0.0005504 | 0.0005498 | 6.00e-07  | 6.7807e-01 |
| <i>Tedania oxeata</i>                | 0.0005504 | 0.0005473 | 3.10e-06  | 6.7892e-01 |
| <i>Ophiosparte gigas</i>             | 0.0005504 | 0.0005481 | 2.40e-06  | 6.7936e-01 |
| <i>Lophaster gaini</i>               | 0.0005504 | 0.0005448 | 5.60e-06  | 6.8102e-01 |
| <i>Epimeria georgiana</i>            | 0.0005504 | 0.0005458 | 4.60e-06  | 6.8108e-01 |
| <i>Notaeolidia gigas</i>             | 0.0005504 | 0.0005487 | 1.80e-06  | 6.8317e-01 |
| <i>Porania antarctica glabra</i>     | 0.0005504 | 0.0005473 | 3.10e-06  | 6.8367e-01 |
| <i>Calanus propinquus</i>            | 0.0005504 | 0.0005469 | 3.50e-06  | 6.8435e-01 |
| <i>Armadillogorgia cyathella</i>     | 0.0005504 | 0.0005459 | 4.50e-06  | 6.8480e-01 |
| <i>Astrochlamys bruneus</i>          | 0.0005504 | 0.0005476 | 2.80e-06  | 6.9077e-01 |
| <i>Tursiops truncatus</i>            | 0.0005504 | 0.0005487 | 1.70e-06  | 6.9411e-01 |
| <i>Lenticulina antarctica</i>        | 0.0005504 | 0.0005463 | 4.10e-06  | 6.9567e-01 |
| <i>Marseniopsis mollis</i>           | 0.0005504 | 0.0005449 | 5.50e-06  | 6.9891e-01 |
| <i>Amphidinium hadai</i>             | 0.0005504 | 0.0005464 | 4.00e-06  | 7.0103e-01 |
| <i>Lysasterias perrieri</i>          | 0.0005504 | 0.0005464 | 4.10e-06  | 7.0131e-01 |
| <i>Metaconchoecia isocheira</i>      | 0.0005504 | 0.0005446 | 5.80e-06  | 7.0326e-01 |
| <i>Fragilariopsis ritscheri</i>      | 0.0005504 | 0.0005449 | 5.50e-06  | 7.0392e-01 |
| <i>Rhynchonereella bongraini</i>     | 0.0005504 | 0.0005486 | 1.80e-06  | 7.0456e-01 |
| <i>Fragilariopsis obliquecostata</i> | 0.0005504 | 0.0005466 | 3.80e-06  | 7.0502e-01 |
| <i>Axociella nidificata</i>          | 0.0005504 | 0.0005498 | 7.00e-07  | 7.0529e-01 |
| <i>Eucampia antarctica</i>           | 0.0005504 | 0.0005510 | -6.00e-07 | 7.1106e-01 |

| Species                     | QSS_all   | QSS_ext   | difQSS    | AD_pvalue  |
|-----------------------------|-----------|-----------|-----------|------------|
| Golfingia ohlini            | 0.0005504 | 0.0005478 | 2.70e-06  | 7.2000e-01 |
| Primnoella                  | 0.0005504 | 0.0005456 | 4.80e-06  | 7.2222e-01 |
| Lobodon carcinophaga        | 0.0005504 | 0.0005481 | 2.30e-06  | 7.2446e-01 |
| Chaetoceros criophilum      | 0.0005504 | 0.0005473 | 3.10e-06  | 7.2489e-01 |
| Cibicides refulgens         | 0.0005504 | 0.0005455 | 5.00e-06  | 7.2764e-01 |
| Chaetoceros socialis        | 0.0005504 | 0.0005459 | 4.60e-06  | 7.2917e-01 |
| Abatus shackeltoni          | 0.0005504 | 0.0005483 | 2.10e-06  | 7.2954e-01 |
| Tritonia antarctica         | 0.0005504 | 0.0005478 | 2.60e-06  | 7.3123e-01 |
| Chaenodraco wilsoni         | 0.0005504 | 0.0005456 | 4.90e-06  | 7.3567e-01 |
| Chaetoceros flexuosum       | 0.0005504 | 0.0005474 | 3.00e-06  | 7.3694e-01 |
| Tedania tantulata           | 0.0005504 | 0.0005474 | 3.00e-06  | 7.3712e-01 |
| Eucranta mollis             | 0.0005504 | 0.0005446 | 5.80e-06  | 7.3790e-01 |
| Muraenolepis marmoratus     | 0.0005504 | 0.0005467 | 3.80e-06  | 7.3804e-01 |
| Psolidium incertum          | 0.0005504 | 0.0005465 | 3.90e-06  | 7.3989e-01 |
| Arcturidae                  | 0.0005504 | 0.0005461 | 4.40e-06  | 7.4485e-01 |
| Lyrocteis flavopallidus     | 0.0005504 | 0.0005448 | 5.70e-06  | 7.4610e-01 |
| Vibilia stebbingi           | 0.0005504 | 0.0005488 | 1.60e-06  | 7.4631e-01 |
| Navicula glaciei            | 0.0005504 | 0.0005496 | 8.00e-07  | 7.4730e-01 |
| Aethotaxis mitopteryx       | 0.0005504 | 0.0005466 | 3.80e-06  | 7.4813e-01 |
| Ekleptostylis debroyeri     | 0.0005504 | 0.0005460 | 4.50e-06  | 7.4826e-01 |
| Fragilariopsis curta        | 0.0005504 | 0.0005504 | 0.00e+00  | 7.4838e-01 |
| Aphrodroma brevirostris     | 0.0005504 | 0.0005470 | 3.40e-06  | 7.5455e-01 |
| Isosicyonis alba            | 0.0005504 | 0.0005480 | 2.40e-06  | 7.5688e-01 |
| Cuenotaster involutus       | 0.0005504 | 0.0005466 | 3.80e-06  | 7.5772e-01 |
| Astrotoma agassizii         | 0.0005504 | 0.0005458 | 4.60e-06  | 7.6108e-01 |
| Pseudostichopus mollis      | 0.0005504 | 0.0005461 | 4.30e-06  | 7.6321e-01 |
| Isodyctia toxophila         | 0.0005504 | 0.0005448 | 5.60e-06  | 7.6350e-01 |
| Gerlachea australis         | 0.0005504 | 0.0005461 | 4.30e-06  | 7.6643e-01 |
| Actinocyclus utricularis    | 0.0005504 | 0.0005489 | 1.50e-06  | 7.6962e-01 |
| Ophioperla koehlerii        | 0.0005504 | 0.0005506 | -2.00e-07 | 7.7037e-01 |
| Diastylis mawsoni           | 0.0005504 | 0.0005464 | 4.10e-06  | 7.7111e-01 |
| Cadulus dalli antarcticum   | 0.0005504 | 0.0005505 | 0.00e+00  | 7.7284e-01 |
| Fragilariopsis sublinearis  | 0.0005504 | 0.0005498 | 7.00e-07  | 7.7730e-01 |
| Lissarca notorcadensis      | 0.0005504 | 0.0005475 | 2.90e-06  | 7.7787e-01 |
| Pyura discoveryi            | 0.0005504 | 0.0005480 | 2.40e-06  | 7.7976e-01 |
| Alacia belgicae             | 0.0005504 | 0.0005462 | 4.20e-06  | 7.8113e-01 |
| Alomasoma belyaevi          | 0.0005504 | 0.0005450 | 5.40e-06  | 7.8180e-01 |
| Callochiton gaussi          | 0.0005504 | 0.0005467 | 3.80e-06  | 7.8780e-01 |
| Chorismus antarcticus       | 0.0005504 | 0.0005481 | 2.40e-06  | 7.8889e-01 |
| Arteidraco loennbergi       | 0.0005504 | 0.0005481 | 2.30e-06  | 7.8945e-01 |
| Eurythenes gryllus          | 0.0005504 | 0.0005458 | 4.60e-06  | 7.9123e-01 |
| Fissidentalium majorinum    | 0.0005504 | 0.0005457 | 4.70e-06  | 7.9497e-01 |
| Molgula pedunculata         | 0.0005504 | 0.0005459 | 4.50e-06  | 7.9826e-01 |
| Oediceroides emarginatus    | 0.0005504 | 0.0005461 | 4.30e-06  | 8.0963e-01 |
| Nitzschia kerguelensis      | 0.0005504 | 0.0005481 | 2.40e-06  | 8.1180e-01 |
| Djerboa furcipes            | 0.0005504 | 0.0005464 | 4.00e-06  | 8.1786e-01 |
| Luidiaster gerlachei        | 0.0005504 | 0.0005509 | -5.00e-07 | 8.1791e-01 |
| Elpidia glacialis           | 0.0005504 | 0.0005464 | 4.10e-06  | 8.1838e-01 |
| Corella eumyota             | 0.0005504 | 0.0005508 | -4.00e-07 | 8.2422e-01 |
| Cassidulinoides parkerianus | 0.0005504 | 0.0005502 | 2.00e-07  | 8.4466e-01 |
| Flustra antarctica          | 0.0005504 | 0.0005460 | 4.40e-06  | 8.4571e-01 |
| Gymnoscopelus braueri       | 0.0005504 | 0.0005466 | 3.80e-06  | 8.4868e-01 |

| Species                      | QSS_all   | QSS_ext   | difQSS   | AD_pvalue  |
|------------------------------|-----------|-----------|----------|------------|
| Prionodraco evansii          | 0.0005504 | 0.0005472 | 3.20e-06 | 8.4906e-01 |
| Thalassiosira australis      | 0.0005504 | 0.0005444 | 6.00e-06 | 8.5047e-01 |
| Peraeospinosus pushkini      | 0.0005504 | 0.0005482 | 2.30e-06 | 8.5152e-01 |
| Natatolana obtusata          | 0.0005504 | 0.0005462 | 4.20e-06 | 8.5152e-01 |
| Waldeckia obesa              | 0.0005504 | 0.0005501 | 4.00e-07 | 8.5261e-01 |
| Psilaster charcoti           | 0.0005504 | 0.0005466 | 3.80e-06 | 8.5942e-01 |
| Stellarima microtrias        | 0.0005504 | 0.0005469 | 3.60e-06 | 8.6017e-01 |
| Uristes gigas                | 0.0005504 | 0.0005469 | 3.60e-06 | 8.6143e-01 |
| Cephalodiscus                | 0.0005504 | 0.0005469 | 3.50e-06 | 8.6187e-01 |
| Limacina helicina antarctica | 0.0005504 | 0.0005452 | 5.20e-06 | 8.6345e-01 |
| Rhincalanus gigas            | 0.0005504 | 0.0005462 | 4.20e-06 | 8.6880e-01 |
| Liothyrella uva              | 0.0005504 | 0.0005479 | 2.50e-06 | 8.9001e-01 |
| Trematomus scotti            | 0.0005504 | 0.0005480 | 2.50e-06 | 8.9462e-01 |
| Perknaster sladeni           | 0.0005504 | 0.0005472 | 3.20e-06 | 8.9727e-01 |
| Pseudostichopus villosus     | 0.0005504 | 0.0005468 | 3.60e-06 | 9.0885e-01 |
| Ophiacantha antarctica       | 0.0005504 | 0.0005468 | 3.60e-06 | 9.1208e-01 |
| Boroecia antipoda            | 0.0005504 | 0.0005458 | 4.60e-06 | 9.1244e-01 |
| Banquisia belgicae           | 0.0005504 | 0.0005471 | 3.30e-06 | 9.1417e-01 |
| Bathybiaster loripes         | 0.0005504 | 0.0005481 | 2.30e-06 | 9.2714e-01 |
| Ekmocucumis turqueti         | 0.0005504 | 0.0005470 | 3.40e-06 | 9.2871e-01 |
| Globocassidulina crassa      | 0.0005504 | 0.0005482 | 2.20e-06 | 9.3398e-01 |
| Crania leointei              | 0.0005504 | 0.0005483 | 2.10e-06 | 9.3455e-01 |
| Vanadis antarctica           | 0.0005504 | 0.0005474 | 3.10e-06 | 9.3605e-01 |
| Hamingia                     | 0.0005504 | 0.0005472 | 3.20e-06 | 9.5433e-01 |
| Balaenoptera musculus        | 0.0005504 | 0.0005478 | 2.70e-06 | 9.5796e-01 |
| Nymphon gracillimum          | 0.0005504 | 0.0005477 | 2.70e-06 | 9.6114e-01 |
| Beroe cucumis                | 0.0005504 | 0.0005480 | 2.40e-06 | 9.6626e-01 |
| Odontaster validus           | 0.0005504 | 0.0005482 | 2.20e-06 | 9.7064e-01 |
| Nototanais dimorphus         | 0.0005504 | 0.0005470 | 3.40e-06 | 9.7187e-01 |
| Nematocarcinus lanceopes     | 0.0005504 | 0.0005489 | 1.50e-06 | 9.7534e-01 |

## Interaction strength distribution

The statistical distribution that best fitted the empirical interaction strength distribution was a ‘gamma’ due to the skew towards weaker interactions. Gamma parameters are: shape = 2.699e-1 and scale = 2.008e+4. Table 3 shows the results for the six candidate models used.

Table 3: Model comparison for the distribution of interaction strengths of the Weddell Sea food web. Order by best fit. References: df = degrees of freedom, AIC = Akaike Information Criterion, deltaAIC = difference with best fit. Log-Normal is the best model.

| Model       | df | AIC       | deltaAIC  |
|-------------|----|-----------|-----------|
| Gamma       | 2  | -362028.3 | 0.00      |
| log-Normal  | 2  | -361975.5 | 52.86     |
| Power-law   | 2  | -353270.2 | 8758.15   |
| Exponential | 1  | -327785.1 | 34243.23  |
| Normal      | 2  | -291497.0 | 70531.30  |
| Uniform     | 2  | -248179.0 | 113849.31 |

## References

- Allesina, Stefano, and Mercedes Pascual. 2008. “Network Structure, Predator–prey Modules, and Stability in Large Food Webs.” *Theoretical Ecology* 1 (1): 55–64. <https://doi.org/10.1007/s12080-007-0007-8>.
- Martinez, Neo D. 1991. “Artifacts or Attributes? Effects of Resolution on the Little Rock Lake Food Web.” *Ecological Monographs* 61 (4): 367–92. <https://doi.org/10.2307/2937047>.
- Pawar, Samraat, Anthony I Dell, and Van M. Savage. 2012. “Dimensionality of Consumer Search Space Drives Trophic Interaction Strengths.” *Nature* 486 (May): 485. <https://doi.org/10.1038/nature11131>.
- Scholz, F. W., and M. A. Stephens. 1987. “K-Sample Anderson–Darling Tests.” *Journal of the American Statistical Association* 82 (399): 918–24. <https://doi.org/10.1080/01621459.1987.10478517>.
- Thompson, Ross M., Martin Hemberg, Brian M. Starzomski, and Jonathan B. Shurin. 2007. “Trophic Levels and Trophic Tangles: The Prevalence of Omnivory in Real Food Webs.” *Ecology* 88 (3): 612–17. <https://doi.org/10.1890/05-1454>.
